# Supplementary material for: Phenotypic Responses of Differentiated Asthmatic Human Airway Epithelial Cultures to Rhinovirus
Source: PubMed Central journal article supplement (PMC4338293; doi:10.1371/journal.pone.0118286), 2015-02-23

Figure S1.

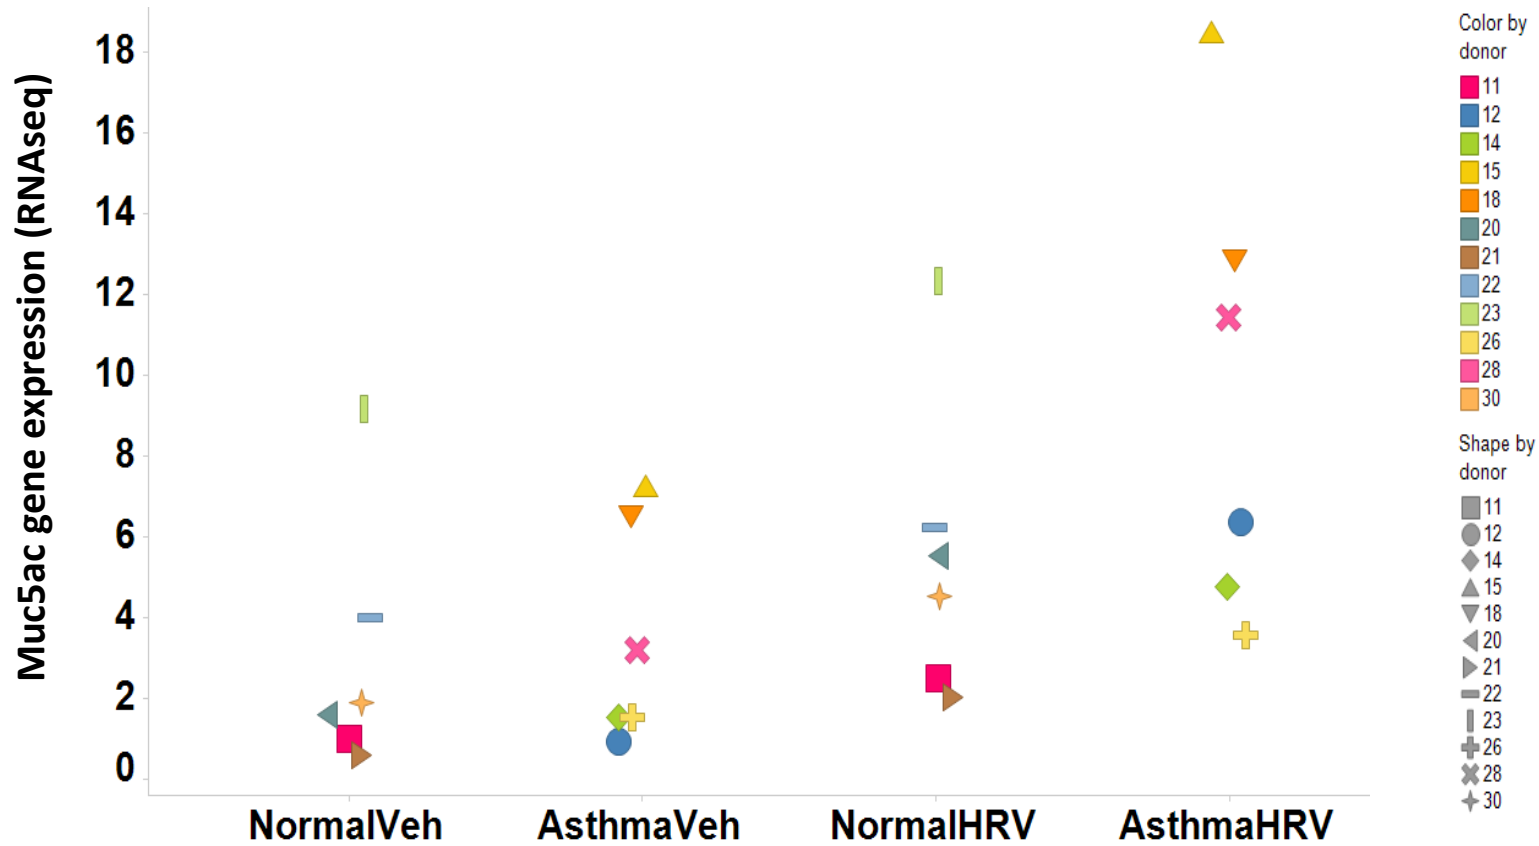

Supplement: pone.0118286.s001.pdf [file pone.0118286.s001.pdf]
