# Supplementary material for: Phenotypic Responses of Differentiated Asthmatic Human Airway Epithelial Cultures to Rhinovirus
Source: PLoS One. 2015 Feb 23;10(2):e0118286. doi: 10.1371/journal.pone.0118286 (PMC4338293; doi:10.1371/journal.pone.0118286)
Supplement: S4 Dataset — (XLSX) [file pone.0118286.s006.xlsx]

## Sheet: A vs. NonA veh difference
geneName	wilcox.pval	lg(FD)	s28A24Veh	s12A24Veh	s26A24Veh	s15A24Veh	s18A24Veh	s14A24Veh	s21N24Veh	s23N24Veh	s20N24Veh	s22N24Veh	s11N24Veh	s30N24Veh
APITD1	0.0021645	-0.236181	0.494419	0.455944	0.435097	0.372579	0.476017	0.213499	0.719026	0.504869	0.806616	0.500022	0.507796	0.826309
BBS1	0.0021645	-0.117496	1.35458	1.20901	1.34318	1.27264	1.23592	1.3713	1.44339	1.37167	1.38768	1.40891	1.44744	1.43251
C19orf25	0.0021645	0.316764	0.816824	0.753644	0.748568	0.78701	0.930239	0.731687	0.221644	0.694459	0.643375	0.449138	0.285634	0.573137
CCNJL	0.0021645	0.371156	0.595153	0.628084	0.784208	0.62992	0.622529	0.526194	0.378163	0.292405	0.168087	0.383409	0	0.337089
CCRL1	0.0021645	-0.27227	0.265467	0.191234	0.35857	0.257474	0.377451	0.329354	0.547011	0.601296	0.553485	0.646934	0.441393	0.62305
CDC42EP5	0.0021645	0.396217	0.634605	0.876278	0.957502	0.562216	0.613752	0.59906	0.541464	0.173183	0.265687	0.327327	0	0.558449
CLK4	0.0021645	-0.214211	0.415647	0.411527	0.296016	0.466139	0.459793	0.499668	0.716268	0.585269	0.640654	0.538073	0.63906	0.714732
DTX2	0.0021645	0.174429	1.80506	1.66714	1.80956	1.74431	1.71281	1.72097	1.63848	1.61046	1.62819	1.63002	1.28131	1.62482
EIF2S3	0.0021645	0.143991	1.5455	1.51878	1.51865	1.5628	1.61789	1.61971	1.44306	1.4442	1.40883	1.30606	1.44527	1.47198
FOXRED2	0.0021645	0.167098	0.656012	0.760854	0.622601	0.759193	0.705102	0.742388	0.513844	0.6163	0.610972	0.43884	0.585207	0.478398
GRK6	0.0021645	0.190195	0.957003	0.95917	1.02559	1.11447	1.09443	0.954359	0.870254	0.919393	0.934515	0.818931	0.545374	0.875383
HSP90AB2P	0.0021645	-0.134235	1.42266	1.32175	1.39282	1.40397	1.37018	1.37254	1.4562	1.57916	1.46016	1.43057	1.71599	1.44725
KDM5C	0.0021645	0.149218	1.43656	1.4242	1.4574	1.40527	1.46405	1.37846	1.37355	1.28774	1.27959	1.28298	1.15433	1.29244
MAP4K3	0.0021645	-0.145499	0.991188	0.970504	0.894787	0.975352	0.870757	1.00456	1.05106	1.01416	1.07321	1.03995	1.29367	1.10809
PEPD	0.0021645	0.229636	1.11499	1.1088	1.22733	1.18864	1.15882	1.19383	0.983733	1.05065	1.02448	0.962568	0.491016	1.10216
PMS2P5	0.0021645	-0.207129	0.896821	0.741929	0.876447	0.702424	0.753523	0.856175	0.955146	0.910201	0.963168	0.981193	1.19878	1.0616
RNF32	0.0021645	-0.234359	0.254035	0	0.36005	0.356402	0.299975	0.168997	0.412789	0.493767	0.41834	0.49971	0.507483	0.513524
SHARPIN	0.0021645	0.147383	1.37751	1.40049	1.42262	1.3804	1.42558	1.4194	1.29617	1.34788	1.23525	1.28276	1.01402	1.36563
SPAG17	0.0021645	-0.253969	1.16966	1.02551	1.1791	1.10481	1.08413	1.16945	1.29953	1.26045	1.36048	1.32624	1.53792	1.47185
SUN2	0.0021645	0.158728	1.09912	1.21771	1.2963	1.18203	1.15916	1.16155	1.07183	1.08851	1.06614	1.09358	0.773967	1.06947
TBK1	0.0021645	0.145465	0.746161	0.757266	0.730628	0.832707	0.814368	0.708074	0.621156	0.651361	0.543732	0.668615	0.572171	0.659385
TTL	0.0021645	0.156349	0.940347	0.891918	0.849343	0.991919	0.930477	0.9315	0.719458	0.798664	0.824413	0.714403	0.723564	0.816907
ZNF767	0.0021645	0.301945	0.356252	0.598462	0.574386	0.441371	0.413544	0.606701	0.153199	0.243638	0.155898	0.197491	0.112433	0.316384
HSPA12A	0.00277843	0.127039	0.274577	0.0904507	0.084523	0.12667	0.0665487	0.119465	0	0	0	0	0	0
ANKRD18A	0.004329	-0.145715	0.394821	0.314157	0.219208	0.28002	0.17784	0.344296	0.417305	0.44629	0.349448	0.399747	0.473215	0.518626
ARSD	0.004329	0.171405	1.36537	1.1352	1.26276	1.17933	1.25966	1.24341	1.15864	1.12011	0.976906	1.05372	0.993806	1.11411
BCCIP	0.004329	0.166239	1.15943	1.04453	1.15381	1.00041	1.00908	0.974209	0.937715	0.995605	0.857001	0.808442	0.86011	0.885171
C13orf29	0.004329	-0.143086	0.170349	0.152407	0.0773816	0	0.0608212	0.197245	0.292012	0.23318	0.370353	0.218176	0.176786	0.226209
DNAH7	0.004329	-0.190482	0.702242	0.795719	0.696789	0.647974	0.768168	0.701344	0.985521	0.777954	1.02283	0.828402	0.838063	1.00235
EXOG	0.004329	0.191697	0.533128	0.429682	0.33762	0.455358	0.449096	0.458976	0.293025	0.268797	0.393665	0.218993	0.223512	0.115684
FBXW10	0.004329	-0.190116	0.274246	0.141539	0.186463	0.194102	0	0.101552	0.560682	0.310099	0.278126	0.278113	0.347889	0.263687
FLJ23152	0.004329	-0.224466	0.937326	0.956236	1.16209	0.881714	1.04393	1.10325	1.13387	1.19354	1.29506	1.22024	1.23089	1.35775
GOLGA8A	0.004329	-0.164791	0.0908368	0.346693	0.329122	0.310134	0.272715	0.295474	0.419232	0.523867	0.55728	0.437533	0.329526	0.366281
KLRD1	0.004329	-0.123969	0.117492	0.148563	0.0752662	0.203183	0.0591281	0.106829	0.229877	0.261852	0.290003	0.213039	0.258256	0.201248
LGALS9	0.004329	0.238467	1.76819	1.82542	1.68157	1.94636	1.75537	1.74402	1.50476	1.65394	1.39112	1.69074	1.46214	1.58744
LOC100288198	0.004329	-0.215807	0.266097	0.159562	0	0.172319	0.324561	0.115134	0.401243	0.491604	0.3603	0.406683	0.314121	0.358561
LRIG1	0.004329	0.234574	1.53043	1.29921	1.33757	1.37139	1.40299	1.25283	1.10757	1.29391	1.17573	1.23782	0.805532	1.1664
LTBR	0.004329	0.195734	1.60307	1.6075	1.55886	1.79532	1.70614	1.62374	1.44102	1.58719	1.34257	1.52	1.29743	1.53201
MOAP1	0.004329	0.16713	0.516689	0.683054	0.6575	0.579055	0.548624	0.557741	0.542775	0.454121	0.413069	0.356182	0.362556	0.411176
ORC5	0.004329	0.210093	0.788382	0.974986	0.879592	0.840452	0.862001	0.886171	0.685783	0.688537	0.813159	0.715419	0.317216	0.75091
PAM	0.004329	0.179326	1.21963	1.09796	1.20603	1.14787	1.31751	1.11236	0.995999	1.11079	0.899251	0.904466	1.02859	1.08631
PNN	0.004329	-0.152977	0.801609	0.850057	0.972086	0.857229	0.815217	0.885194	1.04481	1.09564	1.01871	0.887734	1.01684	1.03553
RABGGTA	0.004329	0.165753	1.33835	1.342	1.30534	1.26086	1.49433	1.28052	1.21496	1.22881	1.1155	1.22629	0.965799	1.27551
RCN1	0.004329	0.207559	1.23067	1.18892	1.27406	1.31381	1.29643	1.24369	1.0823	1.21635	0.966598	1.07962	0.779858	1.17749
RPUSD3	0.004329	0.239039	1.32921	1.21719	1.11039	1.18898	1.17993	1.12763	0.768869	1.09892	0.958319	1.11471	0.720601	1.05768
RSRC1	0.004329	0.146472	0.889858	0.895313	0.965445	0.857052	0.929488	0.912305	0.670314	0.877801	0.755676	0.705078	0.831576	0.730184
SCML1	0.004329	-0.215117	0.228539	0.162748	0	0.124655	0.217554	0.166211	0.522861	0.283824	0.313597	0.349296	0.501503	0.219325
SQSTM1	0.004329	0.118268	2.06249	2.02975	2.06703	2.12749	2.07088	2.07594	2.01552	1.94105	1.95274	2.04108	1.75164	2.02193
STRAP	0.004329	0.107438	1.46846	1.48221	1.61336	1.5812	1.4573	1.46737	1.38448	1.43011	1.34854	1.3763	1.46336	1.42247
WDR60	0.004329	-0.134298	1.20663	1.15081	1.19435	1.13658	1.14356	1.27009	1.33444	1.31316	1.29634	1.25233	1.37095	1.34059
ZDHHC23	0.004329	-0.0953819	0.343521	0.381463	0.362762	0.359097	0.399555	0.292693	0.447959	0.3851	0.563736	0.483968	0.428364	0.402256
ZFP41	0.004329	0.136703	0.597775	0.488888	0.520967	0.536125	0.588752	0.462161	0.253254	0.398307	0.417722	0.399439	0.442434	0.463295
EBLN2	0.00433691	-0.25519	0	0	0	0	0.1948	0.187844	0.447978	0.565389	0.283657	0.207996	0.21234	0.196425
SULT1E1	0.00779583	0.231627	0.193332	0.2396	0.226115	0.370321	0.364794	0.479068	0	0.175472	0	0.196303	0.111691	0
TCP11	0.00812704	-0.348309	0.301168	0.364314	0.346159	0	0	0.540354	0.601693	0.613787	0.517802	0.608447	0.714897	0.585225
AK4	0.00865801	-0.247414	0.782628	0.948432	0.798369	0.695279	0.759908	0.870802	1.02683	0.920102	0.924649	1.14978	1.25025	1.06828
BAZ1A	0.00865801	-0.0647	1.07891	1.07175	1.00423	1.08917	1.07743	1.1081	1.0946	1.19526	1.10727	1.11301	1.17482	1.13283
BCL3	0.00865801	0.182891	1.66341	1.56401	1.51083	1.59747	1.66391	1.6176	1.43814	1.59735	1.30303	1.48185	1.27627	1.42324
BOK	0.00865801	0.176869	1.02127	1.05991	1.02086	0.937685	1.01942	0.920933	0.786893	0.782602	0.901596	0.766541	0.730239	0.950984
BSG	0.00865801	0.132431	2.22822	2.2297	2.29842	2.22461	2.23426	2.24303	2.10583	2.22909	2.16008	2.1378	1.85338	2.17748
C17orf51	0.00865801	0.14452	0.403996	0.223187	0.320333	0.444193	0.318283	0.365603	0.291757	0.317855	0.0775737	0.163249	0.18618	0.171858
C6orf35	0.00865801	0.116508	0.447972	0.433249	0.392019	0.436682	0.459905	0.433061	0.342695	0.351531	0.403672	0.420834	0	0.385106
CADM4	0.00865801	0.181929	1.04141	0.951282	1.00287	1.10076	0.978482	1.00801	0.48988	0.956796	0.945564	0.957054	0.785953	0.855997
CCDC71	0.00865801	0.257846	1.35409	1.26925	1.25495	1.18113	1.24764	1.15391	1.0661	1.21842	1.04262	0.983963	0.646586	0.956205
CCDC80	0.00865801	-0.247822	1.55947	1.44932	1.40441	1.34689	1.53422	1.64412	1.69604	1.5544	1.76935	1.85921	1.88567	1.66068
CX3CL1	0.00865801	0.347571	1.42704	1.37149	1.39593	1.61744	1.80221	1.491	1.28664	1.34398	0.995549	1.20372	0.787249	1.40256
DNASE2	0.00865801	0.124149	1.36446	1.29738	1.36311	1.31833	1.34765	1.37687	1.32162	1.23831	1.28061	1.27174	0.974212	1.2364
EED	0.00865801	-0.110439	0.569459	0.539561	0.549032	0.623585	0.572995	0.511373	0.777833	0.59793	0.621978	0.683499	0.652231	0.695167
EID1	0.00865801	0.221434	1.6619	1.5985	1.68709	1.78231	1.71419	1.60689	1.52554	1.64008	1.57452	1.47045	0.920344	1.59133
EIF4E2	0.00865801	0.153044	1.37945	1.39074	1.4433	1.33455	1.49776	1.43112	1.32587	1.33898	1.30264	1.13721	1.0964	1.35756
ERBB4	0.00865801	-0.11861	0.339783	0.347159	0.285409	0.228336	0.393116	0.420932	0.540945	0.350584	0.428871	0.481438	0.42888	0.495678
FHAD1	0.00865801	-0.167711	1.15301	1.19003	1.29074	0.968718	1.11538	1.15257	1.22865	1.33024	1.29771	1.33383	1.28095	1.40535
GPATCH3	0.00865801	0.280386	0.583332	0.817933	0.7252	0.685822	0.697887	0.549186	0.65636	0.353501	0.500248	0.532039	0.174229	0.160665
HIST1H2BC	0.00865801	0.230155	2.12293	2.03014	2.35721	2.14853	2.13202	2.12295	2.08673	2.01529	2.04342	1.88286	1.51086	1.99369
HMGA1	0.00865801	0.159018	2.2386	2.07625	2.14997	2.30713	2.20735	2.15342	1.85537	2.14615	2.07136	2.08663	2.04274	1.97638
IDH3B	0.00865801	0.307548	1.32215	1.31788	1.54537	1.12729	1.37165	1.27763	1.12832	1.0006	1.01729	1.03016	0.686782	1.25353
ITGB2	0.00865801	0.272239	0.482864	0.615381	0.590986	0.961932	0.762569	0.590999	0.402648	0.399553	0.181775	0.51217	0.384272	0.490879
KIAA0232	0.00865801	-0.0914988	1.12311	1.06571	1.11331	1.0557	1.16015	1.1273	1.13382	1.13937	1.23836	1.16899	1.25229	1.26145
LBR	0.00865801	0.104623	0.824216	0.726649	0.851607	0.773691	0.833821	0.767475	0.743689	0.726953	0.665522	0.652703	0.661533	0.699322
LIX1L	0.00865801	0.362157	0.487114	0.513824	0.63969	0.862911	0.627278	0.837828	0.406478	0	0.312759	0.539193	0.318594	0.218679
MLLT1	0.00865801	0.160312	1.18784	1.09483	1.25556	1.18372	1.19839	1.13148	0.99413	1.09711	0.971671	1.09687	0.842593	1.08758
MSRA	0.00865801	0.312819	0.922873	0.751764	0.805441	0.7851	0.712118	0.647539	0.733672	0.490623	0.279142	0.634077	0	0.610408
NET1	0.00865801	-0.0914902	1.7824	1.81956	1.77852	1.62461	1.75763	1.68459	1.89221	1.84406	1.81379	1.79995	1.82138	1.82487
PIK3C3	0.00865801	-0.139975	0.760448	0.819761	0.832458	0.948422	0.855228	0.937638	1.00407	0.988758	0.967602	0.994146	1.15294	0.886283
PYCR1	0.00865801	0.227199	0.772007	0.687734	0.880089	0.823711	1.01962	0.696484	0.553422	0.763495	0.641644	0.477678	0.405276	0.674937
RAD54L2	0.00865801	0.132703	0.917712	0.919229	0.905091	0.873341	0.920756	0.908796	0.751662	0.899441	0.805942	0.88365	0.510257	0.797756
RC3H1	0.00865801	-0.0626208	1.02608	1.00014	0.952382	1.01569	1.04241	0.989388	1.0545	1.1225	1.02977	1.02974	1.10375	1.06155
RGS5	0.00865801	-0.102283	0.127194	0.160392	0.181319	0.0951794	0.170043	0.227187	0.305141	0.244348	0.309713	0.228798	0.31551	0.1715
RND2	0.00865801	-0.132946	0.237628	0.29142	0.201813	0.286095	0.374338	0.363166	0.389893	0.399478	0.455719	0.395239	0.579038	0.332766
RNF44	0.00865801	0.166934	1.27395	1.21797	1.22364	1.31993	1.31314	1.27233	1.08387	1.26781	1.11135	1.15872	0.967794	1.02983
SAP30	0.00865801	-0.118187	0.805726	0.75744	0.84651	0.847652	0.912443	0.626099	0.924421	0.86833	0.856353	0.920565	0.997056	0.938267
SGK1	0.00865801	0.207369	1.63468	1.66999	1.56747	1.54317	1.7056	1.48568	1.50439	1.50642	1.4692	1.26012	1.1623	1.45995
SHMT1	0.00865801	0.270101	0.962317	1.13213	1.21196	1.08943	1.00719	1.14787	0.688273	0.823522	0.886547	0.969646	0.593038	0.96927
SIRT5	0.00865801	-0.0886664	0.700243	0.68185	0.629465	0.646041	0.627987	0.633829	0.669655	0.720783	0.706857	0.802193	0.753281	0.798643
TMEM189	0.00865801	0.156637	1.51658	1.43191	1.51334	1.65469	1.4873	1.58965	1.4035	1.44084	1.30162	1.33952	1.32387	1.44432
TTC23L	0.00865801	-0.152476	0.394218	0.468544	0.371256	0.383761	0.378108	0.221071	0.424974	0.472649	0.642541	0.399139	0.612088	0.580425
USP28	0.00865801	0.112814	0.720308	0.76838	0.883128	0.748623	0.740686	0.791471	0.661939	0.712832	0.669004	0.735928	0.468147	0.727863
ZBTB39	0.00865801	0.116295	0.64321	0.494726	0.500792	0.532463	0.5157	0.575123	0.485602	0.468229	0.508665	0.380477	0.304362	0.416911
ZNF131	0.00865801	-0.161888	0.748977	0.574173	0.550577	0.506934	0.637987	0.726449	0.861865	0.818333	0.739176	0.739153	0.796628	0.761273
C2CD4B	0.00962172	0.176339	0.12094	0	0.251	0.208606	0.279789	0.197697	0	0	0	0	0	0
DDX3Y	0.00962172	-0.714138	0	0	0	0	0	0	0	0.986783	1.10214	1.04085	0.0891212	1.06593
GJA3	0.00962172	0.0769256	0.0769806	0	0.16806	0.0741584	0.0726532	0.0697019	0	0	0	0	0	0
GPR97	0.00962172	0.145762	0.139322	0.299541	0	0.134543	0.233069	0.0680986	0	0	0	0	0	0
KHDC1	0.00962172	0.262965	0.491957	0.283502	0	0.370494	0.219743	0.212094	0	0	0	0	0	0
LY6H	0.00962172	-0.267395	0	0	0	0	0	0	0.60347	0.277215	0.247739	0.306496	0	0.169453
PRKY	0.00962172	-0.221029	0	0	0	0	0	0	0	0.406799	0.337549	0.268301	0.059273	0.254249
RELN	0.00962172	0.0486479	0.0700176	0.0472135	0.0439758	0.0350231	0.0956574	0	0	0	0	0	0	0
SLC25A34	0.00962172	-0.113081	0	0	0	0	0	0	0.169612	0.0575337	0.172546	0.21758	0	0.0612108
TNFSF14	0.00962172	-0.108518	0	0	0	0	0	0	0.101005	0.117443	0.186014	0.0712228	0	0.175424
CYP2W1	0.0100646	-0.14517	0.155326	0	0	0	0	0	0.215853	0.0758662	0.219405	0.273317	0.161295	0.0806104
HERC2P3	0.0115189	-0.203526	0.0919557	0	0	0.0465766	0	0	0.313725	0.0825612	0.235787	0.465771	0.174162	0.0876833
MEF2BNB-MEF2B	0.0115189	-0.167731	0	0.200278	0	0.215562	0	0	0.222255	0.253447	0.225888	0.280941	0.286372	0.15332
PRR19	0.0115189	0.246476	0.220283	0.556565	0.256441	0.355767	0.285673	0.202235	0.174533	0	0	0.223571	0	0
KPRP	0.0124359	-0.210103	0	0.183751	0.0949452	0	0.243871	0	0.342695	0.132317	0.538215	0.259513	0.264644	0.245802
ABL1	0.0151515	0.166875	1.31065	1.24009	1.28422	1.17979	1.2883	1.26253	1.14656	1.20962	1.20404	1.18453	0.654224	1.16535
ACSS2	0.0151515	0.134985	1.3875	1.29353	1.3539	1.2927	1.46154	1.32758	1.21803	1.24246	1.28785	1.18503	1.02606	1.3474
ACTR1A	0.0151515	0.150883	1.58304	1.5178	1.48933	1.5558	1.65052	1.55681	1.36698	1.55405	1.38047	1.46783	1.16829	1.51038
ALKBH8	0.0151515	-0.123859	0.174799	0.361953	0.280016	0.132527	0.28569	0.222003	0.324901	0.322204	0.461484	0.400543	0.308927	0.382082
APOBEC4	0.0151515	-0.186818	1.2866	1.21753	1.18077	0.955333	1.07613	1.29201	1.3413	1.21276	1.45047	1.36575	1.33286	1.42614
BBS12	0.0151515	-0.230397	0.392073	0.7027	0.497452	0.194012	0.574481	0.560243	0.610034	0.615403	0.887928	0.7621	0.575315	0.852564
BTN3A3	0.0151515	0.223228	0.715228	0.782604	0.84024	0.608307	0.791979	0.817411	0.779597	0.630863	0.551772	0.374135	0.466688	0.41335
C3orf26	0.0151515	0.309396	0.708796	0.627476	0.779042	0.864544	0.779759	0.67149	0	0.667734	0.211919	0.638929	0.647678	0.408466
CA11	0.0151515	0.185789	0.568373	0.575023	0.593877	0.519242	0.548581	0.598127	0.446816	0.564075	0	0.537462	0.409913	0.330221
CBS	0.0151515	0.313258	0.249415	0.482491	0.583837	0.59986	0.785308	0.464694	0	0.180888	0.39492	0.253025	0.383869	0.0733594
CCDC30	0.0151515	-0.149186	0.69201	0.646549	0.503661	0.459707	0.592653	0.578199	0.645854	0.783635	0.698593	0.789633	0.762262	0.687918
CDH13	0.0151515	0.185294	0.895166	0.727498	0.970878	0.976009	0.983214	1.03704	0.848126	0.719238	0.580604	0.719472	0.728658	0.881944
CHRNB1	0.0151515	-0.157725	0.806127	0.809747	0.970736	0.791263	0.904148	0.981141	1.03942	0.893309	1.11606	1.03928	1.04108	1.08036
CNN2	0.0151515	0.211776	2.05118	1.99505	2.11602	2.11923	2.14263	2.07845	1.92677	2.01624	1.87322	2.07406	1.36581	1.9758
DRAM1	0.0151515	0.168273	0.616326	0.457886	0.378063	0.421779	0.676214	0.483699	0.432362	0.354996	0.362952	0.389443	0.113269	0.371305
DTX2P1-UPK3BP1-PMS2P11	0.0151515	-0.138523	0.765509	0.819068	0.858983	0.907913	0.698957	0.820105	1.06561	0.932692	1.00506	0.831763	0.859637	1.00691
EIF4A2	0.0151515	-0.0756255	1.46872	1.51041	1.57484	1.49272	1.42231	1.50517	1.57971	1.52262	1.59749	1.5521	1.5598	1.61621
FADD	0.0151515	0.206257	1.02319	1.01337	1.16514	0.972294	0.938764	0.980982	0.921844	0.817637	0.778499	0.637122	0.698553	1.00254
FAM81A	0.0151515	-0.191874	0.439509	0.332341	0.542678	0.326512	0.374783	0.472014	0.403039	0.653036	0.638118	0.782206	0.55569	0.606992
HSD17B2	0.0151515	0.252107	0.987638	0.81257	0.841888	0.846807	1.23991	0.93014	0.489813	0.541242	0.721442	0.927586	0.667292	0.798935
IFI30	0.0151515	0.167577	1.38225	1.30028	1.40887	1.40659	1.41274	1.4889	1.04509	1.24731	1.2536	1.37241	1.0821	1.39365
KIAA0319	0.0151515	-0.140616	0.463601	0.313833	0.385683	0.355697	0.400703	0.519265	0.440621	0.479986	0.567327	0.640032	0.609654	0.544859
KLC4	0.0151515	0.137429	0.892831	0.872759	0.923134	0.809647	0.801482	0.852243	0.696128	0.729882	0.750449	0.668812	0.619873	0.86238
KRTCAP2	0.0151515	0.161515	2.11077	2.10998	2.22999	2.12454	2.21718	2.15208	2.00351	2.13264	1.96462	2.00093	1.83234	2.0414
LOC100130691	0.0151515	-0.115335	0.142256	0	0.0920454	0.0741062	0.0726019	0.182379	0.110646	0.155377	0.339452	0.252842	0.206317	0.190761
LOC440297	0.0151515	-0.297981	0.528797	0.295806	0.54851	0.233963	0.379515	0.1858	0.659185	1.03219	0.597154	0.778193	0.303408	0.590151
MALAT1	0.0151515	-0.256012	2.42537	2.46619	2.526	2.23629	2.19321	2.32905	2.5623	2.88126	2.60514	2.56265	2.75257	2.34825
MAN1C1	0.0151515	0.200245	0.584983	0.635591	0.649998	0.450484	0.546989	0.55079	0.289348	0.511335	0.293754	0.467375	0.124096	0.531454
MAPKAPK3	0.0151515	0.14889	1.2923	1.24483	1.25518	1.12316	1.25146	1.18081	1.02935	1.11209	1.08536	1.21938	0.850074	1.15816
MARCKSL1	0.0151515	0.191097	1.8207	1.67339	1.92779	1.87994	1.92167	1.82023	1.76646	1.79822	1.41346	1.66518	1.541	1.7128
MBD1	0.0151515	0.102344	1.2232	1.25515	1.35028	1.37087	1.28402	1.33746	1.22248	1.30438	1.1933	1.16155	1.12749	1.19772
MBD4	0.0151515	-0.214437	1.0888	0.822752	0.941394	0.726547	0.7187	0.892383	1.00876	1.09553	1.02979	1.01687	1.20418	1.12208
METTL18	0.0151515	-0.239498	0.373156	0.369301	0.150635	0.218409	0.357598	0.573982	0.705588	0.665204	0.79259	0.377913	0.384529	0.554244
METTL21A	0.0151515	-0.110246	1.03322	0.974737	1.00474	0.855425	1.025	0.978139	1.15373	1.13131	1.00072	1.03642	1.1427	1.06786
MRPL15	0.0151515	0.221808	0.650521	0.914758	1.03622	0.735996	0.843677	0.689855	0.649926	0.708456	0.656937	0.442364	0.449633	0.632869
MRPL39	0.0151515	-0.183602	0.898437	0.696512	0.922767	0.927826	0.996837	1.0448	1.10202	0.975043	1.2094	1.02895	1.14952	1.12385
NARS2	0.0151515	-0.145796	0.416177	0.365267	0.537499	0.33392	0.328754	0.354573	0.447922	0.444626	0.609733	0.609712	0.49157	0.607405
NCOA1	0.0151515	0.0731306	1.04888	0.982341	0.966019	0.97895	1.08671	1.03351	0.901787	0.961117	0.932851	0.921396	1.03127	0.909196
NCRNA00201	0.0151515	-0.104648	0.113583	0.100934	0.171884	0.140718	0.13806	0.0714733	0.277651	0.383	0.206637	0.206627	0.151341	0.139285
NEK1	0.0151515	-0.106085	0.60437	0.735069	0.556077	0.627583	0.620205	0.69097	0.818785	0.694154	0.780059	0.763405	0.638119	0.77626
NPEPPS	0.0151515	-0.164376	1.08396	1.32422	1.1878	1.24526	1.29749	1.24944	1.31065	1.25994	1.39368	1.36582	1.64287	1.40146
NUCB1	0.0151515	0.148895	1.68639	1.83141	1.74706	1.68286	1.76055	1.75634	1.66686	1.62882	1.59779	1.62633	1.302	1.74944
PEMT	0.0151515	0.228262	1.13986	1.02918	0.999819	0.999152	1.17223	0.856538	0.838663	0.925848	0.890605	0.741564	0.553243	0.877283
PHB	0.0151515	0.207955	1.5938	1.72752	1.80939	1.58867	1.71168	1.60271	1.49546	1.45948	1.56836	1.56668	1.01186	1.68419
PHRF1	0.0151515	0.114886	1.05401	1.01015	1.01492	1.07473	1.06587	1.008	0.894334	0.996649	0.978645	1.02871	0.674608	0.96541
POLRMT	0.0151515	0.203922	0.966469	1.04693	1.06848	0.986544	0.977873	0.796589	0.831421	0.85422	0.920614	0.779718	0.469865	0.763511
PRSS12	0.0151515	-0.106974	1.40769	1.19519	1.34832	1.33684	1.23578	1.38464	1.38676	1.424	1.46112	1.37624	1.45208	1.45012
PTGES2	0.0151515	0.29722	0.741368	0.718666	0.862307	0.831041	0.766608	0.520465	0.46696	0.682676	0	0.559665	0.278555	0.669283
RAPGEF5	0.0151515	0.160301	0.60785	0.301528	0.442017	0.484633	0.571002	0.444326	0.282054	0.419418	0.380302	0.210159	0.235201	0.362419
RBM3	0.0151515	0.135922	1.43008	1.408	1.42024	1.29791	1.4524	1.36051	1.23661	1.30669	1.25364	1.23195	1.12781	1.39691
REEP4	0.0151515	0.193291	1.31361	1.36666	1.40782	1.18514	1.28144	1.3675	1.10788	1.11195	1.35984	1.14951	1.09044	0.942806
RNF187	0.0151515	0.144266	1.44678	1.49296	1.5143	1.53191	1.54375	1.53225	1.49124	1.43529	1.40564	1.4908	0.917267	1.45612
RPS4X	0.0151515	0.169682	2.88629	2.76855	2.83706	2.62567	2.77703	2.74584	2.65056	2.6816	2.65257	2.52845	2.50957	2.5996
RTN2	0.0151515	0.168309	0.275252	0.33477	0.499088	0.494663	0.488106	0.413037	0.220732	0.251766	0.224346	0.279129	0.165165	0.353922
SDF2	0.0151515	0.218942	0.853942	1.06497	0.948353	0.838787	1.03004	0.901282	0.833172	0.587829	0.598365	0.797458	0.568907	0.937994
SERINC2	0.0151515	0.232388	2.29798	2.21587	2.1854	2.34839	2.20382	2.16324	1.88508	2.03236	1.89248	2.20891	1.91254	2.08899
SETX	0.0151515	-0.114766	1.03651	0.991486	0.965056	1.06393	1.07603	0.97939	1.10828	1.03462	1.11191	1.12883	1.13169	1.28567
SLC12A8	0.0151515	0.226024	0.436189	0.461339	0.580962	0.377362	0.584667	0.360646	0	0.30623	0.322649	0.441415	0.114488	0.260239
SLC13A2	0.0151515	0.298478	0.698883	0.669799	0.644458	0.519003	0.364404	0.417541	0.341945	0.519545	0.207189	0.258895	0	0.195644
SPEF2	0.0151515	-0.131603	0.921347	0.69876	0.838302	0.702536	0.750111	0.861566	0.922997	0.898589	0.977185	0.919142	0.933881	0.910446
SSH3	0.0151515	0.142659	1.4406	1.50507	1.55811	1.45024	1.46356	1.47997	1.32555	1.46623	1.37025	1.42298	1.07828	1.37829
STARD4	0.0151515	-0.199764	0.59172	0.484913	0.601564	0.646783	0.679242	0.580836	0.779637	0.660138	0.810741	0.854344	0.606342	1.07244
TCN2	0.0151515	0.24763	1.25714	1.12437	1.11441	1.3096	1.19535	1.13108	0.932641	1.15352	1.00829	1.08029	0.630508	0.840917
TGFB1I1	0.0151515	0.220771	0.759313	0.633295	0.760477	0.871112	0.972532	0.741178	0.426814	0.673711	0.432475	0.721565	0.439632	0.719087
TLE1	0.0151515	0.204716	0.955003	0.986881	1.00867	1.02613	1.10462	0.968605	1.00008	0.772839	0.867039	0.678542	0.553872	0.949245
TLE4	0.0151515	-0.114231	1.04624	1.11501	1.10325	1.16459	1.05331	1.0995	1.22108	1.16226	1.12649	1.16036	1.35459	1.24251
TRIM8	0.0151515	0.107088	1.68837	1.71131	1.71462	1.71753	1.7337	1.79852	1.6868	1.65699	1.64342	1.70773	1.31415	1.71244
TTYH3	0.0151515	0.149417	1.23322	1.1518	1.39049	1.21395	1.1511	1.18923	1.07215	1.1133	1.08614	1.19325	0.989158	0.979294
WDR52	0.0151515	-0.193818	0.857613	0.884177	0.897562	0.865427	0.663373	1.05813	1.11946	0.976894	0.988227	1.05453	1.10001	1.15006
WRB	0.0151515	-0.212569	1.08673	1.18463	1.26855	1.03506	1.22112	1.21818	1.38917	1.27683	1.60919	1.34669	1.19705	1.47076
WSB2	0.0151515	0.116347	1.46308	1.51091	1.5097	1.54991	1.60476	1.48209	1.36047	1.40254	1.44771	1.47633	1.24163	1.49368
ZFYVE20	0.0151515	0.106132	0.744052	0.6515	0.70433	0.652487	0.760986	0.755412	0.632529	0.730252	0.550075	0.635572	0.528672	0.554876
ZNF678	0.0151515	0.0832273	0.288316	0.209131	0.252661	0.253249	0.275261	0.266204	0.0705437	0.182669	0.235597	0.0934479	0.240362	0.222838
ZNF84	0.0151515	-0.119696	0.435993	0.461137	0.312414	0.364393	0.481335	0.360471	0.499323	0.518851	0.655537	0.405127	0.5517	0.503379
COL6A1	0.0167114	0.13066	0.169308	0.118253	0.334774	0.0895061	0.160664	0	0	0	0	0	0	0.0885426
LOC100303728	0.0167114	0.141714	0.122192	0	0.144834	0.286885	0.206876	0.19958	0	0.11008	0	0	0	0
RUNDC3A	0.0167114	0.169313	0.174482	0	0.20476	0.23353	0.28523	0.275938	0	0.158062	0	0	0	0
ST3GAL6	0.0167114	0.192229	0.342607	0	0.200086	0.377243	0.161683	0.155707	0	0.0839507	0	0	0	0
CATSPER2P1	0.0181009	-0.185726	0	0.256681	0	0.112155	0	0	0.28309	0.188917	0.28743	0.118185	0.215385	0.390186
NCRNA00247	0.0181009	-0.278373	0	0.153348	0.410227	0	0	0	0.293568	0.269308	0.174086	0.473084	0.526563	0.497204
TBXAS1	0.0181009	0.205968	0.26688	0.325173	0.406707	0.148435	0.145655	0.245985	0	0	0	0.156091	0	0.146936
ARHGEF33	0.0193734	-0.150736	0.167028	0	0	0.0881923	0.158481	0	0.381039	0.0430106	0.234774	0.169669	0.239527	0.250097
BPI	0.0193734	0.22093	0.414519	0.379858	0.469213	0.179321	0.176071	0.16966	0	0.16812	0	0.188253	0.106689	0
NUDT17	0.0193734	0.231012	0.378223	0.345526	0.327995	0.368035	0.501573	0.425297	0.377778	0	0	0.288633	0.294167	0
AMY2B	0.0200224	-0.2805	0.374904	0	0.192197	0.157979	0.269073	0	0.610551	0.304117	0.652519	0.456779	0.291361	0.361827
C12orf26	0.0200224	-0.207008	0.342832	0.119137	0	0	0.328114	0.270274	0.38738	0.358072	0.392721	0.4713	0.176947	0.515981
MSRB3	0.0200224	0.143299	0.0864051	0.198109	0.287484	0.153113	0.308234	0.228301	0	0	0.0675396	0.125969	0.0899964	0.118348
CHDH	0.0249921	0.109511	0.189064	0	0.221291	0.182909	0.0990221	0.0951118	0.0806971	0.0496358	0	0	0	0
EFR3B	0.0249921	0.0438435	0.0549778	0.0708425	0.123462	0.0529136	0.0518142	0	0.0418016	0.0491477	0	0	0	0
GTSE1	0.0249921	0.170844	0.328892	0.153761	0.376516	0.209876	0.115219	0.110747	0	0.269949	0	0	0	0
LOC100505738	0.0249921	-0.155677	0	0	0	0	0.237747	0	0.285508	0.190699	0.168685	0.11939	0.295411	0.112118
MYH3	0.0249921	-0.0883712	0	0	0	0	0.0327799	0.0606625	0.0969267	0.159807	0.179144	0.0682539	0	0.119537
RDH12	0.0249921	0.15066	0.100946	0.22714	0.120171	0.176807	0.297278	0.167257	0	0	0	0.185639	0	0
RNF222	0.0249921	-0.145942	0.220114	0	0	0	0	0	0.174393	0.1116	0.244712	0.125909	0.22799	0.211164
SH2D5	0.0249921	0.189077	0.0538449	0.48849	0.121101	0.304029	0.174861	0.168486	0	0	0	0	0	0.176351
WHAMMP3	0.0249921	-0.115258	0.107892	0	0	0	0.102022	0	0.152983	0.211112	0.155679	0.23515	0	0.146537
A4GALT	0.025974	0.15423	1.52738	1.49096	1.52497	1.54014	1.30972	1.40071	1.41809	1.3771	1.29525	1.24074	1.14049	1.39685
ABCA4	0.025974	0.0844191	0.323307	0.372986	0.265182	0.220956	0.361208	0.271412	0.20968	0.173378	0.213153	0.231466	0.198125	0.282734
ADI1	0.025974	0.129132	1.45226	1.34817	1.38113	1.22686	1.37735	1.37378	1.27849	1.27568	1.33569	1.18712	1.00478	1.30299
ADK	0.025974	0.214083	0.716214	0.931978	1.0402	0.903527	0.996968	0.842398	0.842702	0.573954	0.783337	0.594431	0.602901	0.749462
AKIRIN1	0.025974	-0.112032	0.979537	1.1359	1.20825	1.1353	1.03886	1.11944	1.20441	1.15688	1.24207	1.20266	1.19752	1.28593
ALDH2	0.025974	0.170195	1.48425	1.46006	1.65561	1.55193	1.61095	1.39153	1.34578	1.44464	1.47811	1.36381	1.04921	1.45163
ARMC8	0.025974	0.147101	0.816024	0.859856	0.89862	0.87313	0.842121	0.669792	0.744153	0.654912	0.479855	0.653143	0.722834	0.82204
BCAT2	0.025974	0.206494	1.08283	0.980221	0.965294	0.732591	0.904425	0.911108	0.696789	0.803232	0.883142	0.854218	0.303143	0.796982
BCL7C	0.025974	0.263752	1.23445	1.0647	1.26892	1.32109	1.22305	1.23193	0.43586	1.20024	1.20403	1.17937	0.664797	1.07733
BNIP2	0.025974	0.17882	1.14571	1.0604	0.955782	0.777241	1.16716	1.05699	0.76242	0.775743	1.00702	0.909893	0.731487	0.903799
C10orf47	0.025974	-0.160462	0.513118	0.377345	0.633747	0.60604	0.566678	0.46133	0.723046	0.565201	0.625681	0.698175	0.720475	0.788454
C18orf25	0.025974	-0.130118	1.05524	0.983147	0.959545	1.19693	1.07382	1.04312	1.25932	1.09094	1.09021	1.17998	1.34029	1.13176
C1orf88	0.025974	-0.118253	2.03686	1.9956	1.98523	1.91372	1.83665	2.09668	2.10591	2.03445	2.06727	2.14525	2.15306	2.06832
CCL5	0.025974	-0.101359	0.347786	0.56651	0.543071	0.471877	0.519151	0.452746	0.60884	0.630337	0.615652	0.544263	0.49689	0.613313
CDCA4	0.025974	0.190488	0.726928	0.748547	0.944051	0.712624	0.890981	0.80419	0.70035	0.732082	0.584166	0.49171	0.435593	0.740493
CDHR3	0.025974	-0.256808	1.50392	1.13267	1.34353	1.32292	1.20176	1.57787	1.41215	1.53202	1.6803	1.65356	1.79352	1.55196
CDT1	0.025974	0.220474	0.554354	0.6427	0.820925	0.232695	0.48849	0.562395	0.191091	0.421383	0.473496	0.328081	0.334121	0.230546
CHKA	0.025974	0.150283	0.894943	0.931276	1.02938	0.749927	1.03784	0.89294	0.851251	0.818871	0.785006	0.742647	0.651906	0.784937
CLOCK	0.025974	-0.0972896	1.17234	1.16862	1.13504	1.24925	1.20607	1.10806	1.24847	1.24682	1.25052	1.23053	1.42557	1.22121
CMAHP	0.025974	-0.127914	1.34612	1.29499	1.40775	1.33322	1.47268	1.38429	1.47684	1.48149	1.5029	1.34592	1.53997	1.65942
COL12A1	0.025974	0.196553	0.526356	0.469965	0.557383	0.777689	0.781591	0.447897	0.375538	0.551586	0.415571	0.266297	0.321645	0.450928
COPS7B	0.025974	0.183247	1.19994	1.08244	1.31484	1.08134	1.01594	1.20239	0.991923	1.10006	0.98269	0.945769	0.700394	1.07657
CTU2	0.025974	0.251053	0.335134	0.607971	0.77528	0.509738	0.729933	0.489775	0.272074	0.180831	0.564405	0.394804	0.206412	0.322984
CWF19L2	0.025974	-0.149711	0.348781	0.34509	0.193966	0.24044	0.271357	0.191219	0.283913	0.321025	0.460011	0.353337	0.416883	0.653951
CYC1	0.025974	0.245251	1.92098	1.80945	1.73572	1.6796	1.94993	1.81295	1.57766	1.87843	1.61376	1.67151	1.03577	1.65998
CYP4X1	0.025974	0.175071	1.40175	1.26231	1.24464	1.38843	1.36815	1.39847	1.22805	1.39388	1.06886	1.00405	1.16305	1.15542
DAB2IP	0.025974	0.113286	1.46412	1.38148	1.50031	1.41713	1.34443	1.36642	1.29436	1.4018	1.34373	1.32378	1.0767	1.3538
DDX54	0.025974	0.13125	1.0634	1.10095	1.18409	1.0342	1.07938	1.09876	0.990129	1.07242	1.04879	1.03958	0.726502	0.895868
DEF8	0.025974	0.16211	0.88164	0.902077	1.01376	0.78572	0.973256	0.938723	0.880975	0.799131	0.659813	0.850032	0.501147	0.831421
DNAH12	0.025974	-0.145692	0.867135	0.908613	0.91913	0.668977	0.824587	0.791652	0.977601	0.901411	1.11394	0.969585	0.86805	1.02366
EAPP	0.025974	0.133323	1.44877	1.41264	1.44228	1.23152	1.36104	1.40365	1.34491	1.1716	1.24207	1.24672	1.32625	1.16843
EIF5A	0.025974	0.18043	2.36584	2.19025	2.37082	2.36064	2.33791	2.35853	2.14517	2.35568	2.07206	2.21358	1.86496	2.24995
ENDOD1	0.025974	-0.0695952	0.833983	0.891855	0.767946	0.736558	0.789857	0.807596	0.853442	0.927777	0.808898	0.898913	0.896566	0.85977
EPB41L4B	0.025974	-0.134886	1.10393	1.03211	1.08505	1.09987	1.11998	1.09063	1.15984	1.09757	1.22918	1.34402	1.40628	1.104
EPHB2	0.025974	0.206431	1.18	0.956702	1.14349	1.21664	1.06949	0.989915	0.819724	1.09492	0.875912	0.986132	0.606833	0.934126
EPHB4	0.025974	0.130435	1.19939	1.0488	1.15425	1.13955	1.20731	1.04478	0.985522	1.10812	1.03808	1.10736	0.801487	0.970889
EXOC6	0.025974	0.1236	0.77882	0.731138	0.674793	0.722231	0.49002	0.709437	0.489045	0.649253	0.599673	0.474981	0.623466	0.528419
FAM134C	0.025974	0.163788	1.26082	1.19362	1.36705	1.14553	1.30194	1.30442	1.0056	1.25112	1.19284	1.03043	0.935796	1.17488
FAM203A	0.025974	0.356493	0.96815	0.892362	0.864164	0.855561	0.88188	1.1233	0.285851	0.892688	0.3556	0.661983	0.436943	0.813395
FBN2	0.025974	-0.125328	0.108275	0.174831	0.128701	0.175627	0.0869116	0.126747	0.430699	0.151978	0.156203	0.25949	0.308909	0.24578
FNBP1	0.025974	-0.191027	0.637347	0.721106	0.80773	1.01863	0.845616	0.777786	0.876594	0.945574	0.892381	1.03836	1.21032	0.991141
GAS2L1	0.025974	0.221557	0.735657	0.900445	0.939451	0.83907	0.671039	0.640786	0.767834	0.373793	0.642899	0.63419	0.385475	0.592913
GDA	0.025974	-0.169481	1.16356	1.05978	1.10105	0.900717	1.11581	1.16388	1.36892	1.20586	1.21914	1.29017	1.06269	1.37492
GNL3L	0.025974	0.0756721	0.844994	0.866053	0.833626	0.985276	0.981592	0.858599	0.76313	0.782983	0.83167	0.80623	0.790841	0.941253
GPR108	0.025974	0.18488	1.58592	1.53511	1.56392	1.58751	1.62767	1.46582	1.41197	1.57742	1.293	1.45221	1.00774	1.51433
GPR153	0.025974	0.126617	1.05579	1.04335	1.17136	1.25409	1.06689	1.09396	0.969371	1.15088	1.00258	0.918954	0.960762	0.923198
GPSM2	0.025974	0.169581	0.902769	0.764168	0.824795	0.639247	0.878934	0.647207	0.476366	0.527065	0.579824	0.675188	0.634439	0.746752
H6PD	0.025974	0.128123	1.09074	1.09233	1.2081	1.0936	1.24873	1.14937	1.06591	1.16295	1.05834	1.07206	0.67358	1.0813
HDHD2	0.025974	0.144757	0.864025	0.924222	0.978323	1.01312	0.85359	0.823865	0.782692	0.623485	0.857517	0.747767	0.719692	0.857446
HERC4	0.025974	0.0982645	0.670784	0.777117	0.706033	0.686685	0.809791	0.708487	0.700167	0.599334	0.530261	0.644906	0.593374	0.701268
HIST1H1E	0.025974	0.24683	2.34533	1.96572	2.40598	2.33152	2.18623	2.27398	1.94863	2.19025	2.08009	2.14903	1.73459	1.9252
HIST1H2BG	0.025974	0.273105	1.736	1.44522	1.95263	1.51408	1.58404	1.51385	1.25596	1.4354	1.68071	1.31602	1.18398	1.23511
HIST2H2BE	0.025974	0.1464	1.43425	1.38584	1.52437	1.25645	1.51653	1.36306	1.31027	1.31823	1.28097	1.24235	1.14913	1.30115
HLA-C	0.025974	0.218909	2.73821	2.53244	2.46561	2.66644	2.76756	2.64356	2.43059	2.61438	2.23238	2.57624	2.29283	2.35395
HNF4G	0.025974	-0.13278	0.555269	0.418325	0.342948	0.384134	0.418662	0.387405	0.554717	0.694104	0.604056	0.42076	0.554082	0.475703
HPS1	0.025974	0.171577	1.20217	1.24036	1.26386	1.2538	1.18026	1.25661	1.20514	1.16482	1.16711	1.23156	0.550871	1.0481
IDH1	0.025974	0.135649	1.6266	1.60729	1.66095	1.46923	1.70389	1.54394	1.53617	1.45145	1.57651	1.40986	1.33889	1.48512
IL20RB	0.025974	0.158268	1.48908	1.46926	1.51217	1.2714	1.5721	1.58733	1.19479	1.44246	1.36351	1.35445	1.42889	1.16765
INSR	0.025974	0.151084	1.33361	1.30412	1.30076	1.38522	1.435	1.30225	1.14245	1.35459	1.08592	1.19715	1.08913	1.28521
KCNQ1OT1	0.025974	-0.0879308	0.637482	0.591777	0.552554	0.603785	0.572514	0.626453	0.586599	0.710694	0.648533	0.642153	0.88445	0.639722
KIAA0889	0.025974	0.152659	0.815701	0.62578	0.575406	0.665381	0.710897	0.55636	0.526006	0.638969	0.567694	0.502711	0.252972	0.545219
KIAA0930	0.025974	0.15401	1.15722	1.14609	1.21732	1.22643	1.19066	1.02868	1.09518	1.03878	1.07295	0.967797	0.769643	1.09799
KIAA1377	0.025974	-0.15311	0.725199	0.624023	0.701278	0.590792	0.543614	0.856864	0.7333	0.737651	0.955154	0.797432	0.970485	0.76641
KIF4A	0.025974	0.088468	0.463913	0.442514	0.374531	0.399729	0.355265	0.507722	0.30308	0.341854	0.375513	0.282409	0.313401	0.396609
KLF13	0.025974	0.117957	1.13655	0.994288	1.11789	1.08347	1.19419	1.11601	0.959738	1.09811	0.998508	0.993509	0.813808	1.07098
LOC100505854	0.025974	-0.176557	0.098938	0.125776	0.210418	0.0953954	0	0.452917	0.24704	0.225691	0.470655	0.25096	0.255966	0.592477
LOC388692	0.025974	-0.125694	0.18648	0.172448	0.0415963	0.233751	0.0324065	0.181406	0.337197	0.247776	0.0752568	0.26502	0.435549	0.241454
LOC550112	0.025974	-0.204247	0.505063	0.519831	0.700617	0.429643	0.590079	0.298233	0.519205	0.871804	0.756422	0.77313	0.711052	0.637334
LRRC6	0.025974	-0.190719	1.51127	1.30572	1.38956	1.40686	1.24719	1.56235	1.61388	1.44003	1.4979	1.64817	1.78491	1.58237
MBD3	0.025974	0.233014	1.04477	1.10325	1.22167	0.996694	1.26611	0.89892	1.02019	0.731557	1.02835	0.883708	0.590629	0.8789
MBD5	0.025974	-0.104926	0.630633	0.633921	0.609191	0.741225	0.693626	0.63486	0.78892	0.760974	0.729231	0.722226	0.918242	0.653418
MGAT4A	0.025974	0.186781	0.419981	0.398996	0.52552	0.446696	0.529047	0.371984	0.188205	0.450647	0.136467	0.208252	0.244984	0.342986
MLIP	0.025974	-0.226263	0.324118	0.237577	0	0.367582	0.100499	0.39682	0.262554	0.671454	0.494101	0.382555	0.481506	0.492005
MORC4	0.025974	0.180234	0.575482	0.533767	0.685402	0.547293	0.636994	0.556058	0.338827	0.630461	0.343732	0.416434	0.423451	0.300685
NAPA	0.025974	0.171762	1.68319	1.70346	1.74464	1.63292	1.64654	1.77778	1.64812	1.60499	1.57887	1.60197	1.06078	1.66324
NDUFS8	0.025974	0.242236	1.70013	1.64084	1.74522	1.67746	1.7187	1.77408	1.39638	1.73591	1.50493	1.6391	0.970887	1.55581
NLK	0.025974	0.14808	0.744713	0.807537	0.816208	0.751823	0.793299	0.69561	0.684559	0.422111	0.778542	0.622384	0.509687	0.703426
NOTCH3	0.025974	0.154993	1.3265	1.2005	1.4124	1.31853	1.31182	1.22191	1.01175	1.28122	1.30996	1.15417	1.02613	1.07847
NR2C1	0.025974	-0.134531	0.600502	0.595487	0.53464	0.445859	0.401147	0.538679	0.656984	0.706439	0.745416	0.606673	0.450527	0.757461
NRG2	0.025974	0.160033	0.179206	0.427577	0.166342	0.173311	0.342235	0.502158	0	0.16242	0.143153	0.250623	0.102829	0.171607
ORC4	0.025974	-0.0798823	1.23971	1.18352	1.18302	1.25042	1.25347	1.21041	1.25382	1.30861	1.36432	1.2017	1.36044	1.31095
OSBPL10	0.025974	0.125151	0.918882	0.923281	0.902778	0.939237	1.05433	0.907764	0.930551	0.867575	0.811954	0.769069	0.699292	0.81692
OXR1	0.025974	-0.108088	0.918924	1.00679	0.933601	0.862421	0.900499	0.93012	1.0399	0.940383	1.06067	1.00801	1.22601	0.925917
PAIP2	0.025974	-0.117972	1.20337	1.35873	1.35185	1.19576	1.23668	1.41646	1.46089	1.2441	1.53871	1.42211	1.36033	1.44452
PATZ1	0.025974	0.151147	1.07986	1.07848	1.13402	1.09593	1.13322	1.03231	0.842832	1.1147	0.969468	0.959882	0.7359	1.02416
PCM1	0.025974	-0.114852	1.50333	1.48839	1.49074	1.42216	1.44604	1.51095	1.56055	1.468	1.59239	1.57066	1.71517	1.64395
PHGDH	0.025974	0.298461	1.16203	1.08557	1.40491	1.37291	1.48608	1.14028	0.86771	1.05026	1.14661	0.997023	0.643957	1.15544
POLR3GL	0.025974	0.236518	0.996652	0.818139	0.888144	0.739388	1.08534	0.99003	0.549615	0.798076	0.628179	0.792138	0.508173	0.822405
PPAPDC2	0.025974	0.150932	0.638304	0.797609	0.826746	0.62476	0.780321	0.752711	0.677609	0.582523	0.357863	0.74868	0.579989	0.568193
PYGB	0.025974	0.23699	1.64224	1.81515	1.71007	1.81045	1.8452	1.57542	1.59074	1.52953	1.65332	1.50801	1.05613	1.63886
RPL27A	0.025974	0.169835	1.88136	1.79009	1.90333	1.86569	1.75279	1.66366	1.64892	1.68192	1.68403	1.71412	1.42969	1.67923
RPL35	0.025974	0.204841	2.50455	2.4653	2.49305	2.2553	2.51999	2.31519	2.19241	2.39591	2.2058	2.18471	1.98104	2.36446
SCAND1	0.025974	0.182593	0.899137	0.912772	0.908849	1.0044	1.16714	0.896156	0.631004	0.790952	0.690351	0.962585	0.851392	0.766607
SCOC	0.025974	-0.192057	0.479319	0.862354	0.641041	0.389369	0.720778	0.776325	0.891503	0.803982	0.855007	0.787765	0.797263	0.886008
SECISBP2	0.025974	0.128801	1.10188	0.973496	1.0315	1.04927	1.17035	1.0687	0.794524	1.02378	0.965333	0.961806	0.82172	1.05523
SLC25A37	0.025974	0.161162	0.569786	0.909832	0.862182	0.875831	0.802813	0.803384	0.798101	0.727265	0.74532	0.54268	0.431854	0.611637
SLC4A2	0.025974	0.157995	1.20824	1.22689	1.27498	1.19984	1.2367	1.12135	1.1518	1.08567	1.03585	1.16015	0.686223	1.20033
SLC9A4	0.025974	-0.241477	0.485884	0.529907	0.580511	0.285844	0.467658	0.156959	0.648298	0.417424	0.655301	0.705649	0.88052	0.648431
SMC3	0.025974	-0.13163	0.928031	0.740636	0.870249	0.852254	0.922301	0.991124	0.991443	0.971977	1.04584	1.04091	1.13629	0.907922
SMPD1	0.025974	0.220914	1.07956	0.915283	0.872637	1.04844	0.956215	0.869596	0.851633	0.906347	0.675824	0.895265	0.495935	0.591238
SPATA6	0.025974	-0.134606	1.02437	0.881826	0.922658	0.79426	0.680001	0.973873	0.97558	0.985969	1.10947	0.944879	1.02944	1.03928
SPICE1	0.025974	-0.113893	0.828815	0.730588	0.836784	0.658683	0.699008	0.698174	0.88405	0.953111	0.753778	0.742777	0.942037	0.859656
SPRYD7	0.025974	0.158951	0.526014	0.541093	0.648004	0.754183	0.580226	0.582255	0.632928	0.42724	0.292493	0.465682	0.518723	0.341003
SRSF4	0.025974	0.136304	1.1811	1.05007	1.31596	1.21816	1.27864	1.17546	1.13209	1.16578	1.14045	1.14042	0.835502	0.987312
STARD7	0.025974	0.0885699	1.48037	1.4474	1.48066	1.3759	1.51932	1.47584	1.39602	1.44521	1.41621	1.29426	1.30502	1.39135
STX5	0.025974	0.108297	1.45185	1.47347	1.45734	1.47814	1.32852	1.46825	1.27441	1.35415	1.36767	1.44715	1.21139	1.35302
STXBP4	0.025974	-0.128634	0.678215	0.440643	0.537478	0.571993	0.526059	0.641599	0.544897	0.68035	0.728412	0.72839	0.825501	0.660242
SYDE2	0.025974	-0.0943189	0.0845217	0.194277	0	0.150007	0.205529	0.19827	0.215745	0.246256	0.219295	0.421955	0.0880423	0.207224
SYTL2	0.025974	-0.178105	1.30677	1.45282	1.35308	1.06496	1.37178	1.29474	1.55051	1.33373	1.45271	1.45921	1.51182	1.60479
TCEB2	0.025974	0.15238	2.11024	2.08459	2.20209	2.02915	2.08981	2.0137	2.03501	1.98562	2.04394	1.95885	1.63318	1.95871
TCP11L2	0.025974	-0.0863663	1.36804	1.39265	1.43754	1.24749	1.46186	1.42687	1.50165	1.46606	1.40044	1.45274	1.54388	1.48788
THSD4	0.025974	0.149554	0.68786	0.644905	0.583363	0.785378	0.721051	0.646176	0.682293	0.601746	0.481497	0.569023	0.345491	0.491361
TMEM168	0.025974	0.157115	0.718242	0.525604	0.717095	0.671116	0.483526	0.588219	0.543236	0.450183	0.573033	0.409326	0.31636	0.468976
TMEM17	0.025974	-0.190143	0.312088	0.227966	0.292434	0	0.394642	0.494705	0.526583	0.491462	0.532934	0.416225	0.322215	0.573277
TMEM67	0.025974	-0.0951935	1.04666	1.06085	1.05179	0.878237	0.950025	1.08308	1.10245	1.01207	1.09964	1.15089	1.16475	1.112
TPBG	0.025974	0.148387	0.984679	0.895188	1.19146	0.982035	1.06095	1.02706	0.89902	0.896976	0.894455	0.934615	0.66176	0.964233
TRNAU1AP	0.025974	-0.155719	0.901646	0.992484	1.13808	0.960475	1.00519	1.1451	1.12406	1.06498	1.23984	1.21028	1.20001	1.23812
TUBA1C	0.025974	0.156214	1.96486	1.84199	1.96127	2.00249	2.0008	1.81535	1.74911	1.93866	1.81361	1.8059	1.38807	1.95413
TXNDC16	0.025974	0.104526	0.156924	0.268843	0.254145	0.263817	0.207636	0.143235	0.122495	0.198559	0.17581	0	0.0890692	0.0815111
UTP6	0.025974	-0.185815	0.788628	0.625059	0.783576	0.632881	0.922393	0.854906	0.787987	0.946117	1.01563	0.902715	1.09815	0.971738
VPS24	0.025974	0.139048	0.412368	0.543604	0.466901	0.451098	0.340481	0.475854	0.384441	0.107669	0.294222	0.360172	0.366591	0.342922
VWA2	0.025974	0.203008	0.679358	0.512596	0.897955	0.616341	0.591438	0.520233	0.611367	0.427763	0.364189	0.515323	0.235215	0.44602
WBP2	0.025974	0.0800059	1.8953	1.87602	1.91144	1.9306	1.96114	1.97853	1.85934	1.92296	1.87288	1.88877	1.6621	1.86693
ZBTB43	0.025974	-0.172051	0.49385	0.30124	0.578225	0.377067	0.539803	0.414462	0.658169	0.741369	0.688877	0.522566	0.603446	0.522527
ZBTB49	0.025974	-0.12715	0.226312	0.326814	0.263193	0.219221	0.21541	0.11626	0.306214	0.45049	0.409634	0.310783	0.234355	0.418632
ZFAND2B	0.025974	0.241294	1.02498	1.09988	1.08699	0.976475	1.13383	0.982747	1.05465	0.978468	0.905181	0.691089	0.255918	0.971828
ZMYM1	0.025974	-0.144911	0.344986	0.386198	0.419215	0.335388	0.39457	0.218363	0.356299	0.468138	0.598469	0.624706	0.401852	0.518723
ZMYND11	0.025974	0.0956082	1.23905	1.18329	1.18237	1.17631	1.20746	1.07922	1.0981	1.17579	0.946982	1.17711	1.05604	1.04002
ZNF124	0.025974	0.220705	0.754796	0.797488	0.600989	0.78829	0.519129	0.699499	0.602822	0.620116	0.432264	0.450125	0.335865	0.394771
ZNF274	0.025974	0.150468	0.764396	0.788786	0.986161	0.678088	0.846681	0.763469	0.675486	0.782798	0.57114	0.648515	0.557563	0.689272
ZNF555	0.025974	-0.0793555	0.350911	0.26837	0.25369	0.267815	0.236223	0.185123	0.295623	0.312052	0.337806	0.399422	0.312369	0.380993
ZNF561	0.025974	-0.156017	0.964636	0.795803	0.919373	0.869087	0.935109	0.99879	0.999109	0.91889	1.1043	1.01676	1.27622	1.10362
BTBD19	0.0262788	-0.219164	0	0.266072	0	0	0	0	0.29316	0	0.297607	0.364047	0.223624	0.402617
C19orf57	0.0262788	0.18675	0.263987	0.32185	0.305143	0	0.143862	0.24326	0	0	0	0	0.157605	0
LOC100287559	0.0262788	-0.137677	0	0	0	0.132248	0	0	0.19177	0.298311	0.195009	0	0.142331	0.13089
LOC100302401	0.0262788	-0.143422	0	0	0.176684	0	0	0	0.28457	0.0729656	0.212192	0	0.216593	0.250893
ADAM1	0.0277684	-0.113239	0.132384	0	0	0.12781	0	0	0.185724	0.0637878	0.188881	0.23714	0.137605	0.126491
ANKS1B	0.0277684	-0.10236	0	0	0	0.111678	0	0.105226	0.115569	0.0721677	0.210195	0.150756	0.0838541	0.198518
FCAR	0.0277684	-0.132089	0	0.254122	0	0	0	0.104442	0.16241	0.317138	0.165242	0.116821	0.119518	0.26997
PCDHGA5	0.0277684	0.141783	0.158324	0.11017	0.186353	0.35545	0.0815314	0.202024	0	0	0	0.160851	0	0.0823017
C1orf101	0.0284407	0.0768123	0.119093	0.150519	0.0763419	0.11492	0	0	0	0	0	0	0	0
CHST1	0.0284407	-0.0893148	0	0	0	0	0	0	0	0.089084	0.251407	0.10083	0	0.0945685
CPA6	0.0284407	0.148156	0.184905	0.229637	0	0.305174	0	0.169218	0	0	0	0	0	0
CYorf15A	0.0284407	-0.191461	0	0	0	0	0	0	0	0.437759	0.124798	0.300734	0	0.285478
DCLK2	0.0284407	0.0633994	0.0909436	0.115888	0	0.0876593	0.0859061	0	0	0	0	0	0	0
EIF1AY	0.0284407	-0.474046	0	0	0	0	0	0	0	0.552593	0.882872	0.596509	0	0.812305
FAM153C	0.0284407	-0.138106	0	0	0	0	0	0	0	0.263492	0.235111	0.169929	0	0.160104
FAM95B1	0.0284407	-0.173257	0	0	0	0	0	0	0	0.110993	0	0.125236	0.1281	0.675214
GLOD5	0.0284407	-0.270808	0	0	0	0	0	0	0.481276	0.532244	0	0.227994	0.383332	0
KDM5D	0.0284407	-0.531772	0	0	0	0	0	0	0	0.923673	0.858686	0.670909	0	0.737364
LOC100132111	0.0284407	0.314104	0	0.558621	0.627422	0.35736	0	0.341223	0	0	0	0	0	0
LOC100506472	0.0284407	0.07163	0.0576342	0	0.128972	0	0.102608	0.140566	0	0	0	0	0	0
LOC441208	0.0284407	-0.157113	0	0	0	0	0	0	0.509916	0.0866817	0	0.178148	0	0.167933
LRRN2	0.0284407	0.0753194	0.118479	0.14977	0.0759296	0	0	0.107738	0	0	0	0	0	0
PCDHGA8	0.0284407	0.0808542	0.0733246	0	0.160807	0.184628	0	0.0663657	0	0	0	0	0	0
PRIMA1	0.0284407	0.0716447	0.10583	0	0.125858	0.102068	0	0.096112	0	0	0	0	0	0
RPS4Y1	0.0284407	-1.1319	0	0	0	0	0	0	0	1.70646	1.68672	1.62709	0	1.77111
SGK3	0.0284407	-0.0884677	0	0	0	0	0	0	0.126477	0	0.227965	0	0.0920766	0.0842873
SLC9A5	0.0284407	0.0679274	0	0.131885	0.123606	0.100194	0.0518794	0	0	0	0	0	0	0
TAS2R3	0.0284407	-0.24922	0	0	0	0	0	0	0.37594	0	0.381183	0	0.465861	0.272337
TBL1Y	0.0284407	-0.136395	0	0	0	0	0	0	0	0.193129	0.215596	0.154891	0	0.254755
TNNI2	0.0284407	-0.27771	0	0	0	0	0	0	0.481666	0.44823	0	0.377066	0	0.359297
TSPO	0.0284407	0.210482	0.322005	0.387893	0.368992	0.184001	0	0	0	0	0	0	0	0
TSPY26P	0.0284407	0.216951	0.263172	0	0.30424	0	0.337118	0.397177	0	0	0	0	0	0
TTTY15	0.0284407	-0.172544	0	0	0	0	0	0	0	0.12761	0.505885	0.296692	0	0.105075
USP9Y	0.0284407	-0.597202	0	0	0	0	0	0	0	0.945741	0.8502	0.890715	0	0.896557
ZFY	0.0284407	-0.351108	0	0	0	0	0	0	0	0.562125	0.441749	0.499343	0	0.603434
C15orf42	0.02948	0.167467	0.413139	0.0787071	0.39356	0.157127	0.154211	0.24234	0	0.147088	0.228932	0	0	0.0582642
CCL17	0.02948	0.325479	0.708796	0.499786	0.477834	0.619122	0.611789	0.393991	0.539615	0.391148	0	0.427682	0	0
FAM89A	0.02948	0.275705	0.637311	0.273359	0.346356	0.511023	0.352911	0.342158	0	0.112734	0.483062	0	0	0.21309
FZD10	0.02948	-0.17577	0	0.25727	0	0.112456	0	0.191078	0.16463	0.260054	0.382339	0.1185	0.416639	0.273259
AGAP5	0.0303479	-0.210973	0.263498	0.189701	0	0.34276	0	0.242799	0.458506	0.455165	0.464403	0.357083	0.157278	0.412161
ANKRD18B	0.0303479	-0.209149	0	0.131643	0.219346	0.181235	0	0.134541	0.147312	0.341875	0.423108	0.42309	0.406806	0.179468
AP3S2	0.0303479	0.111194	0.125295	0.158082	0.148421	0.215422	0.288259	0.204233	0.17631	0	0.0988612	0.127369	0.0700045	0
PNPLA7	0.0303479	-0.121242	0	0.19117	0.215215	0.147492	0.0783645	0	0.212371	0.137976	0.215879	0.215868	0.322522	0.255076
RAB34	0.0303479	0.238017	0.696286	0.396007	0.308812	0.188765	0.414514	0.482307	0.266947	0	0.271109	0.333593	0	0.186939
LMO3	0.0340869	-0.215527	0.101367	0.128772	0	0	0.0958135	0	0.252196	0	0.256189	0.744652	0.190329	0.175748
SPESP1	0.0340869	-0.232295	0	0	0	0.224463	0.220582	0.212911	0.312895	0	0.317545	0.545809	0.506753	0.368725
CABP4	0.0379415	-0.13414	0.0971807	0	0	0	0	0.0463234	0.194031	0.0873043	0.1973	0.179305	0	0.290403
CARD9	0.0379415	0.194063	0	0.406084	0.332157	0.162153	0.366972	0.153262	0	0	0	0	0.0957132	0.16054
FNDC4	0.0379415	0.204363	0.20315	0.524936	0.23719	0.196632	0.193132	0.31614	0.445003	0	0	0	0	0
PBK	0.0379415	0.179926	0.315125	0.230387	0.418841	0.306097	0	0.169808	0	0.168267	0	0	0.192433	0
SLC25A1	0.0379415	0.279234	0	0.531489	0.598721	0.200046	0.331291	0.421773	0	0	0	0.209783	0	0.198134
CHN1	0.0402534	-0.120797	0	0	0	0.141503	0	0	0.204307	0.132317	0.116157	0.148859	0.264644	0
RWDD3	0.0402534	-0.202829	0	0	0	0	0.233339	0	0.329273	0.223401	0.52066	0.141774	0	0.235207
UBQLNL	0.0402534	0.155865	0.26984	0.194643	0	0.150304	0.147494	0.334432	0	0	0	0	0.161525	0
41341	0.0411255	0.214061	0.943186	0.747627	0.90863	1.0295	0.823274	0.979935	0.522186	0.975659	0.659465	0.677888	0.510033	0.802559
AASS	0.0411255	-0.170094	0.473805	0.350536	0.444095	0.220184	0.147239	0.141714	0.50355	0.536858	0.364398	0.411101	0.523479	0.458751
ABCC6P2	0.0411255	0.22222	0.812966	0.663794	0.427374	0.561187	0.687865	0.540201	0	0.536805	0.491689	0.380477	0.588494	0.362605
ALDH1B1	0.0411255	0.185698	0.747314	0.554119	0.818896	0.947797	0.835529	0.683497	0.646942	0.679713	0.352701	0.684965	0.433652	0.674992
ARHGDIB	0.0411255	0.156831	1.95253	1.92172	1.66867	1.92692	1.85094	1.92202	1.84229	1.76271	1.45268	1.69329	1.75708	1.79378
ARMC7	0.0411255	0.215167	0.931777	0.796807	0.790365	0.685661	0.883253	0.82709	0.719108	0.849536	0.50011	0.465771	0.473253	0.616174
ATG4A	0.0411255	-0.126993	0.85077	0.895179	0.951901	0.677619	0.813973	0.894086	0.856721	0.921196	1.09022	0.994279	0.906074	1.077
BCL11B	0.0411255	0.0918128	0.181268	0.26719	0.168283	0.242043	0.172127	0.229804	0.0769689	0.164322	0.253307	0.164917	0	0.050323
BRD3	0.0411255	0.144496	1.06837	0.763572	0.918095	1.07158	0.886545	0.966057	0.885291	0.870138	0.771553	0.872431	0.600539	0.80729
BRE	0.0411255	-0.127192	1.22315	1.21684	1.15844	1.33993	1.35021	1.26483	1.29725	1.39308	1.26053	1.41652	1.56695	1.38221
C14orf118	0.0411255	0.100943	0.770957	0.596532	0.776404	0.837744	0.876209	0.78769	0.770321	0.66525	0.754591	0.543762	0.601056	0.7049
C15orf23	0.0411255	0.178867	0.696456	0.815549	0.809055	0.529301	0.902623	0.832051	0.673609	0.611201	0.744541	0.400992	0.555844	0.525646
C19orf56	0.0411255	0.153848	1.67068	1.69562	1.84792	1.31705	1.79035	1.68087	1.52587	1.52316	1.52307	1.62666	1.26043	1.6202
C1orf43	0.0411255	0.108955	1.83464	1.78684	1.78811	1.75584	1.86884	1.86254	1.66513	1.67548	1.73636	1.68375	1.61499	1.86737
C2orf77	0.0411255	-0.196389	0.627325	0.667047	0.429978	0.537051	0.582585	0.777091	0.682269	0.539754	0.993165	1.0184	0.784122	0.781696
C4orf47	0.0411255	-0.193063	0.859437	0.92961	0.90106	0.476462	0.594083	0.902888	0.903198	0.711961	0.951489	1.00007	1.16398	1.09122
C5AR1	0.0411255	-0.170442	0.954009	0.842463	0.96192	1.14186	0.940021	1.06702	1.10202	1.22355	1.03783	1.12489	1.33835	1.10329
C6orf155	0.0411255	-0.174739	0.308621	0.162285	0	0.175219	0.21697	0.285408	0.180906	0.453064	0.454303	0.348477	0.500487	0.259705
C9orf41	0.0411255	-0.0816546	0.450943	0.53089	0.426024	0.532584	0.525766	0.538666	0.571934	0.535275	0.65191	0.628786	0.637474	0.46942
CARM1	0.0411255	0.141652	1.20885	1.27149	1.32953	1.24794	1.15982	1.20412	1.19888	1.22387	1.163	1.14714	0.777717	1.06125
CCDC104	0.0411255	-0.190622	1.4807	1.41091	1.49795	1.17728	1.30431	1.52917	1.61025	1.33931	1.69751	1.62913	1.75246	1.5154
CCDC106	0.0411255	0.170916	0.745906	0.823958	0.817441	0.906883	0.857276	0.667182	0.800925	0.75849	0.721817	0.664911	0.314383	0.532625
CCDC67	0.0411255	-0.15894	0.641109	0.67154	0.745868	0.818417	0.493247	0.525994	0.820679	0.855029	0.809446	0.875022	0.884853	0.604783
CECR1	0.0411255	-0.490084	0.898929	0.756895	1.01586	1.12419	0.388224	1.49032	1.58039	1.3206	1.46284	1.6329	0.956509	1.66167
CENPB	0.0411255	0.167652	1.41175	1.22581	1.34547	1.35095	1.28184	1.35474	1.12938	1.31525	1.21592	1.26756	0.721241	1.31531
CEP89	0.0411255	-0.109933	0.891483	0.766312	0.853934	0.997359	0.954908	0.861444	1.08051	1.00551	1.07816	1.02071	0.768608	1.03153
CERKL	0.0411255	-0.197219	0.782085	0.734329	0.927568	0.561949	0.748363	0.939512	1.00749	0.835544	1.16379	0.936951	0.79846	1.13488
CHPF	0.0411255	0.169464	1.3712	1.37499	1.44412	1.40949	1.33881	1.23384	1.25773	1.36864	1.26016	1.21499	0.809324	1.24482
CHST14	0.0411255	0.183513	0.763601	0.716279	0.736986	0.675097	0.741088	0.671644	0.531086	0.753571	0.579416	0.52251	0.234927	0.582103
CLGN	0.0411255	-0.122912	0.660772	0.581987	0.824002	0.64702	0.671784	0.714049	0.676816	0.784207	0.730552	1.02798	0.832687	0.784839
CNBP	0.0411255	0.109728	1.40514	1.45281	1.43617	1.41525	1.48427	1.42589	1.29012	1.32685	1.41179	1.29365	1.19853	1.4402
CNNM3	0.0411255	0.104198	0.79589	0.758187	0.751292	0.828187	0.879263	0.938024	0.64258	0.919704	0.706869	0.628617	0.688113	0.739769
CPXM2	0.0411255	0.129168	0.37098	0.49501	0.559962	0.555267	0.657823	0.564095	0.534644	0.464951	0.150025	0.46619	0.328239	0.484082
CRCP	0.0411255	0.108823	1.1345	1.09194	1.13502	1.04009	1.26823	1.16173	0.902808	1.11334	1.06371	0.967881	1.01749	1.11335
CRISPLD1	0.0411255	-0.155577	0.380431	0.453265	0.43249	0.22341	0.440003	0.392254	0.579497	0.262305	0.642631	0.558465	0.504955	0.707466
CRTAP	0.0411255	0.150721	1.051	0.971741	1.16957	1.02308	0.894386	1.10675	0.83224	1.07614	0.881583	0.900973	0.800652	0.820607
DAZAP1	0.0411255	0.190543	1.40998	1.21711	1.54269	1.42555	1.42314	1.32995	1.24703	1.32943	1.2033	1.39469	0.734241	1.29646
DDI2	0.0411255	-0.148167	0.902374	0.775127	0.670309	0.629762	1.00945	0.807831	1.0484	0.923083	1.0102	0.842962	0.919517	0.939682
DDRGK1	0.0411255	0.158089	1.41418	1.44119	1.46275	1.1931	1.43709	1.41245	1.376	1.21952	1.36274	1.276	0.826699	1.35128
DDX17	0.0411255	-0.10909	1.61138	1.56056	1.70188	1.64865	1.56414	1.58851	1.67348	1.80136	1.64123	1.66601	1.85914	1.68843
DDX49	0.0411255	0.178223	1.10899	1.26412	1.11689	1.02232	1.19015	1.20665	1.09887	1.16017	0.838809	0.961242	0.702133	1.07856
DIP2C	0.0411255	0.102679	0.358286	0.201131	0.352041	0.173854	0.31874	0.164435	0.197505	0.162934	0.143616	0.0777131	0.103177	0.267467
DLG1	0.0411255	-0.0978408	1.41551	1.42064	1.36716	1.43079	1.51099	1.44829	1.60029	1.43807	1.45265	1.5085	1.67843	1.5025
DNAAF1	0.0411255	-0.168753	1.78002	1.53925	1.7207	1.52776	1.46981	1.81006	1.81496	1.8625	1.85364	1.92051	1.6661	1.74241
DNAH11	0.0411255	-0.174646	0.840173	0.933813	0.850245	0.728299	0.697711	0.744039	1.02805	0.791952	1.12462	0.869096	0.919753	1.10869
DNAH6	0.0411255	-0.126965	0.878849	0.862329	0.954172	0.759433	0.802629	0.783708	0.939475	0.880926	1.06377	0.985257	0.83201	1.10148
DNAL1	0.0411255	-0.148279	1.07794	0.988847	1.04356	0.939429	1.01978	1.07947	1.10218	1.03715	1.1673	1.06798	1.43373	1.23035
DNALI1	0.0411255	-0.239466	1.48095	2.01513	2.10361	1.92249	1.67736	1.99678	2.13587	2.0558	2.06354	2.15931	1.98146	2.23713
DPH3	0.0411255	-0.102951	0.438215	0.662369	0.63715	0.530278	0.653876	0.552718	0.639032	0.656777	0.681824	0.714902	0.642054	0.757725
ENKUR	0.0411255	-0.161947	1.44711	1.30586	1.38428	1.28567	1.23871	1.52261	1.48699	1.38788	1.39006	1.57074	1.73342	1.58683
EPB41	0.0411255	0.108329	0.833836	0.889642	1.00632	0.905613	0.994385	0.862454	0.799704	0.892975	0.709853	0.738027	0.87679	0.824923
EPHA1	0.0411255	0.139977	0.806704	0.801049	0.900578	0.702283	0.655728	0.725505	0.640866	0.845198	0.647834	0.556596	0.460227	0.601264
FAM3A	0.0411255	0.141993	0.964517	0.897796	0.869545	0.9331	0.916515	0.734393	0.869042	0.878794	0.876847	0.654794	0.553649	0.630782
FBXL12	0.0411255	-0.147917	0.767579	0.775127	0.694042	0.790995	0.724769	0.953821	0.917543	0.949576	1.05346	0.925452	0.8224	0.925403
FBXW4	0.0411255	0.233195	1.13115	1.33211	1.40872	1.10772	1.28233	1.27308	1.09748	1.16023	1.27426	1.07821	0.518328	1.00744
FGFR1	0.0411255	0.13401	0.305013	0.44448	0.0816281	0.172868	0.169713	0.115524	0.0983521	0.0609631	0	0.129032	0.131971	0.0648434
FNBP1L	0.0411255	-0.0623994	0.976812	1.0659	0.972173	1.09338	1.10002	1.05704	1.10894	1.11827	1.0094	1.0977	1.19822	1.10719
GLS	0.0411255	0.116094	0.287601	0.189764	0.213672	0.279132	0.409529	0.166827	0.118094	0.19197	0	0.153922	0.157333	0.228642
GM2A	0.0411255	0.142456	1.63864	1.62935	1.70577	1.60608	1.78631	1.60369	1.52965	1.76515	1.53042	1.49595	1.35805	1.43588
GPBP1	0.0411255	-0.0744801	1.04761	1.08586	1.01903	0.986984	1.0514	1.05292	1.13335	1.10168	1.09768	1.00073	1.25311	1.10415
GPR85	0.0411255	-0.0867333	0.347641	0.186617	0.175539	0.173391	0.197518	0.239064	0.31626	0.319947	0.352203	0.210857	0.26843	0.372473
GSTA1	0.0411255	0.285329	1.56927	1.40608	1.40068	1.36335	1.22117	1.56351	0.598716	1.12465	1.32239	1.40228	1.2244	1.13966
GTPBP8	0.0411255	0.193994	1.02721	0.835396	0.915497	0.777221	0.901321	0.753032	0.73595	0.965453	0.696391	0.743299	0.249491	0.655126
HIST1H4K	0.0411255	0.308226	1.0947	0.67704	1.34042	0.812265	0.956838	0.78769	0.722732	0.548823	0.988645	0.592597	0.397137	0.569665
HIST2H2AC	0.0411255	0.333617	1.88892	1.73412	2.11187	1.61308	1.98046	1.82951	1.30264	1.60283	1.85622	1.67235	1.02901	1.6932
HOMER3	0.0411255	0.296974	0.935779	1.27922	1.29179	1.04162	1.23021	1.02462	1.10716	0.914957	0.961903	0.888457	0.18519	0.96373
IFITM1	0.0411255	0.272406	2.44811	2.36064	2.14544	2.29494	2.65843	2.41714	2.12491	2.42557	2.11317	2.14492	1.60981	2.27188
INPP1	0.0411255	0.161556	0.751664	0.903804	0.922014	0.771275	0.851629	0.713467	0.489475	0.743236	0.749403	0.680062	0.468866	0.813473
INPP5A	0.0411255	0.176901	0.84688	0.86523	0.765397	0.696284	0.790677	0.658622	0.486199	0.639939	0.619088	0.670837	0.318287	0.827337
IRAK1BP1	0.0411255	-0.187544	0.693428	0.587858	0.495742	0	0.484799	0.57386	0.746993	0.752831	0.700017	0.88572	0.163618	0.711775
ISOC1	0.0411255	0.156791	0.81107	0.854815	0.783862	0.574288	0.908267	0.676042	0.523903	0.672275	0.697563	0.621889	0.502523	0.649447
KIAA1644	0.0411255	0.213429	0.295778	0.227874	0.260814	0.857266	0.503141	0.288583	0.223878	0.255238	0.0897422	0.115954	0.167664	0.300403
KIF2A	0.0411255	-0.0886371	1.16959	1.13945	1.217	1.11305	1.14066	1.29117	1.26965	1.16757	1.31406	1.24207	1.29304	1.31635
KLC2	0.0411255	0.187095	1.1489	0.972099	1.23415	1.2657	1.13835	1.17045	0.921679	1.17452	0.954447	0.938031	0.749816	1.06858
KLHDC3	0.0411255	0.116045	1.46142	1.43972	1.61393	1.36682	1.43505	1.44858	1.33326	1.55079	1.32652	1.32388	1.20061	1.33418
KLRAQ1	0.0411255	-0.0987252	0.692771	0.541093	0.565907	0.533311	0.563042	0.548944	0.678092	0.652102	0.639859	0.685207	0.632253	0.749905
KRT14	0.0411255	0.349244	2.81944	2.72981	2.65827	2.53362	2.72751	2.47873	2.46211	2.63723	2.71409	1.57045	2.08882	2.37923
LAMA2	0.0411255	-0.101696	0.151381	0.29185	0.196329	0.146254	0.285558	0.152643	0.35197	0.191843	0.356998	0.241485	0.34235	0.349545
LANCL2	0.0411255	0.144154	0.868892	0.822659	0.950913	0.892593	0.662979	0.848376	0.557652	0.844279	0.675076	0.701421	0.643951	0.759112
LENG8	0.0411255	-0.166542	1.15014	1.21918	1.32609	0.997148	1.00418	1.0989	1.35351	1.40948	1.30734	1.29747	1.25369	1.1734
LEPROTL1	0.0411255	0.0691309	0.98025	0.920409	0.939699	0.751499	0.929895	0.970713	0.915966	0.899573	0.860652	0.697261	0.881649	0.822579
LIN9	0.0411255	0.164646	0.344815	0.254237	0.39387	0.39001	0.195645	0.463029	0.162491	0.256997	0.165324	0.349337	0.119581	0
LLGL1	0.0411255	0.259312	1.16599	1.08513	1.33978	1.05501	1.14055	1.15634	1.057	0.932002	0.99881	1.09602	0.176431	1.12666
LOC100130705	0.0411255	-0.123952	0.102483	0.311385	0.121962	0.0988274	0.0968748	0.234704	0.341541	0.338753	0.419538	0.258562	0.106664	0.244888
LOC100287765	0.0411255	0.108464	0.341486	0.211575	0.199328	0.282866	0.326807	0.215843	0.132882	0.153659	0.135276	0	0.176123	0.329182
LOC157381	0.0411255	-0.183294	0.472873	0.136605	0.460359	0.257906	0.220342	0.422061	0.547703	0.458603	0.603454	0.618689	0.525822	0.315634
LOC220729	0.0411255	-0.172926	0.295175	0.550897	0.527786	0.210302	0.451422	0.199323	0.592677	0.619957	0.696137	0.599384	0.224966	0.53934
LOC646851	0.0411255	-0.106412	0.525481	0.35934	0.643897	0.459835	0.439232	0.522787	0.655507	0.597702	0.633258	0.601833	0.532805	0.56794
LRGUK	0.0411255	-0.170758	0.709571	0.671287	0.855225	0.829865	0.601178	0.996405	1.02294	0.961626	1.04253	0.916905	0.741105	1.00298
LRPPRC	0.0411255	0.0836604	1.19212	1.20996	1.19267	1.13794	1.21655	1.20756	1.16734	1.16659	0.972799	1.08876	1.20181	1.05754
LRRC37A2	0.0411255	-0.154248	0.250989	0.446765	0.169243	0.138482	0.2829	0.440234	0.273829	0.291164	0.567143	0.555235	0.483709	0.483024
LRRK1	0.0411255	0.0993821	0.775497	0.855455	0.832813	0.67074	0.861899	0.750802	0.712813	0.746875	0.676086	0.666701	0.591894	0.756546
MAK	0.0411255	-0.124325	0.942905	0.885796	0.902066	0.939662	0.771035	1.06563	0.95466	1.13913	1.04624	1.02011	1.04102	1.05189
MAML2	0.0411255	-0.0861456	1.31734	1.37374	1.21004	1.32513	1.2332	1.39244	1.41479	1.33469	1.3844	1.42421	1.36249	1.44818
MCCC1	0.0411255	-0.180585	0.789435	0.754974	0.800501	0.564263	0.766643	0.707223	1.08948	0.959147	0.849146	0.702727	0.83317	1.03289
MOBKL2B	0.0411255	0.121198	0.490398	0.304879	0.488228	0.395962	0.608231	0.518054	0.378936	0.363191	0.168514	0.384188	0.390872	0.39286
MRPL14	0.0411255	0.214235	1.44515	1.40414	1.57556	1.45701	1.62789	1.60265	1.41343	1.50071	1.16711	1.37695	0.955727	1.41306
MRPS11	0.0411255	0.108043	1.16096	1.26158	1.33318	1.00277	1.19208	1.15585	1.13421	1.14214	0.965995	1.07901	1.0073	1.12951
MRPS2	0.0411255	0.193172	1.58963	1.23756	1.41339	1.36554	1.41789	1.38858	1.24454	1.37318	1.27721	1.35906	0.842593	1.15698
MTPN	0.0411255	-0.0902286	0.250072	0.225686	0.212806	0.175614	0.0947098	0.166116	0.407289	0.283682	0.253701	0.253689	0.372423	0.0955914
MTRNR2L10	0.0411255	-0.211861	1.58	1.83612	1.74388	1.47771	1.61563	1.55939	1.89618	1.69107	1.81872	1.76379	2.12304	1.79111
NCAPD2	0.0411255	0.143511	0.944098	0.974657	1.07098	0.861431	0.93015	0.932579	0.971118	0.872209	0.728062	0.825266	0.599223	0.856952
NCOA4	0.0411255	0.0917993	1.99753	1.89665	1.85271	1.92746	1.98152	1.92317	1.8255	1.99222	1.77692	1.83957	1.7774	1.81665
NCRNA00188	0.0411255	0.180501	1.8657	1.7967	1.87772	1.64655	1.9759	1.92065	1.49841	1.76714	1.69849	1.65438	1.65094	1.73085
NOC4L	0.0411255	0.215826	0.663749	1.03645	1.09211	0.958496	0.85825	0.984207	0.568566	0.722153	0.945439	0.834156	0.460648	0.76734
NOTCH1	0.0411255	0.184358	0.705632	0.577904	1.04141	0.786411	0.810358	0.668395	0.445735	0.754496	0.644189	0.5634	0.597369	0.478771
NUDT22	0.0411255	0.347266	1.06336	1.17255	1.02768	0.935098	0.926554	0.930043	0.797686	0.572566	1.16037	0.661896	0	0.779179
NUDT7	0.0411255	0.20803	1.00801	0.632378	0.936017	0.914672	0.906182	0.795712	0.544179	0.672768	0.828982	0.550616	0.652648	0.695596
NUP62	0.0411255	0.128709	1.06736	1.0947	1.27811	1.091	1.10968	1.00349	1.02846	0.99373	1.03664	1.09031	0.708845	1.01411
OBFC2A	0.0411255	-0.21775	0.305362	0.369071	0.350763	0.452756	0.661974	0.282323	0.815362	0.528577	0.571588	0.600828	0.594862	0.617534
OCLN	0.0411255	-0.182008	0.857179	1.07241	0.990886	0.923317	1.2338	0.965642	1.2268	1.02579	1.16292	1.1735	1.24896	1.29731
ODZ2	0.0411255	0.212401	1.01451	0.698578	0.908227	0.903225	1.04531	0.838071	0.515665	0.89218	0.8841	0.496777	0.609973	0.734821
OGDH	0.0411255	0.169373	1.86019	1.80876	1.8097	1.95419	1.829	1.79244	1.69085	1.90401	1.69499	1.69023	1.35592	1.70205
ORAI1	0.0411255	0.162823	1.15208	1.30315	0.903407	1.11452	1.17539	1.16629	0.657603	1.08325	1.14391	1.06771	0.846059	1.03937
P4HA1	0.0411255	-0.165315	1.0181	1.18752	1.09631	1.01615	0.940712	1.14372	1.2215	1.01206	1.25598	1.25805	1.35241	1.2944
PCDHB13	0.0411255	0.211018	0.438158	0.140289	0.382961	0.545261	0.320314	0.3624	0.218092	0.180619	0.159566	0.201931	0.16307	0
PHLDB2	0.0411255	0.115599	0.702091	0.799267	0.682423	0.747169	0.832545	0.597435	0.569769	0.593869	0.576372	0.639256	0.533069	0.755004
PIP5K1B	0.0411255	-0.090211	1.07441	1.04194	0.9714	0.965604	1.10167	0.995677	1.13235	1.04758	1.19244	1.0221	1.14504	1.15246
PLLP	0.0411255	0.233426	0.921882	0.765472	0.998198	0.787809	0.914806	0.531541	0.699324	0.759549	0.70655	0.225644	0.57946	0.548624
PRPF4	0.0411255	-0.110901	0.764781	0.792117	0.795232	0.750197	0.950219	0.900426	0.824026	0.823004	0.98592	0.903876	1.02283	1.05872
PRSS8	0.0411255	0.137952	1.76827	1.83113	1.79472	1.74312	2.00824	1.73739	1.79193	1.73456	1.7295	1.53778	1.51753	1.74387
QSOX1	0.0411255	0.17217	1.89079	2.01278	2.00523	2.07965	2.02897	1.96686	1.91568	1.97789	1.85548	1.92616	1.31125	1.9648
RAB3D	0.0411255	0.182919	1.3209	1.1788	1.21803	1.26314	1.28	1.28838	1.06439	1.29321	1.14565	0.99547	0.832481	1.12053
RABGAP1L	0.0411255	-0.0993071	1.10148	1.02799	1.18357	0.986517	1.07383	1.15484	1.22151	1.07851	1.30634	1.19397	1.16297	1.16077
RABL5	0.0411255	-0.0766441	1.48914	1.52406	1.5635	1.42308	1.45688	1.52524	1.52718	1.5573	1.6287	1.59529	1.49029	1.643
RAD18	0.0411255	0.149834	0.655835	0.418438	0.338791	0.430285	0.520924	0.425262	0.184168	0.287692	0.460493	0.278447	0.360093	0.319637
RIN1	0.0411255	0.196529	0.676828	0.714874	0.954135	0.523904	0.844366	0.640244	0.667568	0.425759	0.517727	0.683329	0.409874	0.470918
ROD1	0.0411255	-0.0623783	1.44882	1.38134	1.42417	1.449	1.4958	1.43466	1.49522	1.50243	1.44187	1.48876	1.58295	1.49683
RPL23AP7	0.0411255	-0.29746	0.609948	0.567022	0.906983	0.218988	0.830681	1.0213	1.02999	0.849032	0.861203	1.00208	1.14173	1.05564
RPL39L	0.0411255	0.329482	0.57451	0.807795	1.37378	0.561615	0.873034	0.672883	0.486	0.346869	0.922632	0.380822	0.38747	0.362939
RPLP0	0.0411255	0.161637	2.93689	2.88769	3.00931	2.701	2.96031	2.86448	2.71657	2.86263	2.80224	2.7758	2.37875	2.85387
RPS25	0.0411255	0.107077	2.54715	2.41202	2.41909	2.41815	2.45173	2.40897	2.13084	2.48954	2.32885	2.36882	2.35318	2.34342
RRAGC	0.0411255	0.198282	0.884687	1.09757	1.01728	0.782068	1.19031	0.932525	0.831262	0.820117	0.929994	0.827531	0.669414	0.636436
RYK	0.0411255	0.0967862	1.22151	1.15608	1.21212	1.09328	1.11773	1.09972	1.00065	1.11101	1.0808	1.06138	0.923103	1.14277
SCARB1	0.0411255	0.164503	0.999473	1.15366	1.23271	1.04978	1.14355	1.22549	1.03693	1.09909	0.820088	0.956072	0.763181	1.1423
SEC14L5	0.0411255	-0.0772309	0.118447	0.149731	0.075908	0.0315143	0.112073	0.0571846	0.231533	0.106663	0.203897	0.120423	0.123193	0.222534
SLC11A2	0.0411255	-0.0596465	1.4524	1.47034	1.42783	1.41749	1.66583	1.4376	1.56583	1.48653	1.4949	1.50686	1.50503	1.67022
SLC35F2	0.0411255	0.100488	0.586696	0.63737	0.651793	0.591007	0.445742	0.645845	0.586128	0.473582	0.345358	0.514243	0.543306	0.492906
SLC39A3	0.0411255	0.195445	0.941853	0.588201	0.973667	0.853965	1.04612	0.947496	0.743436	0.750913	0.750835	0.646654	0.56139	0.725406
SLC45A4	0.0411255	0.161453	0.835451	1.06549	1.03588	0.935912	0.948519	1.05544	0.773646	0.827561	0.908705	0.951526	0.545163	0.901373
SLC7A5	0.0411255	0.339153	1.62548	1.45921	1.94509	1.90792	2.1276	1.64933	1.35251	1.75647	1.45877	1.52463	1.01376	1.57357
SMUG1	0.0411255	0.264071	0.638513	0.712158	0.916758	0.316435	0.715529	0.565055	0.578289	0.220372	0.432525	0.330024	0.250118	0.468693
SPNS1	0.0411255	0.161641	1.28228	1.08005	1.24521	1.16164	1.30944	1.17773	1.15389	1.04432	1.18254	1.07445	0.681072	1.15024
SYBU	0.0411255	0.136677	1.32067	1.09499	1.07223	1.08135	1.11832	1.12375	1.01383	1.22417	0.884418	1.04117	0.911934	0.915736
TMCC3	0.0411255	-0.21788	0.487164	0.73373	0.461119	0.827009	0.592812	0.72723	1.02357	0.600623	0.832644	0.732013	0.933442	1.01405
TMCO7	0.0411255	0.0997896	0.545624	0.68561	0.357052	0.506687	0.526236	0.632381	0.504419	0.483573	0.465464	0.31532	0.472925	0.413151
TMEM101	0.0411255	0.267089	0.926703	1.12476	0.908484	0.81926	1.05449	0.932321	0.833645	0.748154	0.774505	0.797925	0	1.00925
TMEM182	0.0411255	0.104607	0.298268	0.361019	0.375593	0.318767	0.529412	0.303825	0.153019	0.243378	0.270096	0.435348	0.201438	0.255962
TMUB1	0.0411255	0.161429	1.31327	1.07963	1.17508	1.13408	0.973175	1.22563	1.0265	1.15097	0.917318	0.939188	0.853808	1.04453
TOMM70A	0.0411255	0.0662453	1.00044	1.01078	1.16165	1.01353	1.03188	1.11834	0.960446	0.987563	1.00787	0.948774	0.941176	1.09333
TOR1A	0.0411255	0.121633	1.28258	1.19731	1.13106	1.06288	1.31707	1.18079	1.02794	1.1172	1.03612	1.01104	1.01081	1.23877
UBL7	0.0411255	0.127257	1.27903	1.13778	1.31875	0.84425	1.21183	1.19353	1.09379	1.04723	1.13701	1.12565	0.756659	1.06129
UCHL5	0.0411255	0.124768	0.588066	0.586772	0.548342	0.401742	0.470347	0.574847	0.546783	0.440796	0.40047	0.147327	0.487519	0.398612
VKORC1L1	0.0411255	0.135576	1.29037	0.867256	1.10771	1.27362	1.11407	1.27433	0.798003	1.0777	1.0954	1.07122	1.02871	1.04286
YEATS4	0.0411255	0.189078	0.83041	0.584264	0.854159	0.791772	0.926645	0.942785	0.627196	0.510572	0.505714	0.837423	0.742292	0.572369
YIPF4	0.0411255	-0.0874234	0.608955	0.603907	0.613902	0.646613	0.639136	0.709758	0.802949	0.705916	0.615187	0.75464	0.802207	0.665912
ZC3H7A	0.0411255	-0.11433	0.945589	0.93747	1.02241	0.682948	0.914897	0.870811	0.970257	0.92511	0.996436	1.07223	1.06221	1.03387
ZCCHC14	0.0411255	0.126015	0.94144	0.76286	0.858875	1.04781	0.931478	0.917738	0.79568	0.899577	0.832737	0.680734	0.661734	0.833647
ZDHHC17	0.0411255	0.136012	0.46379	0.426698	0.554419	0.482424	0.379192	0.3853	0.549157	0.194532	0.217125	0.295103	0.275919	0.343915
ZNF235	0.0411255	-0.0880523	0.11968	0.151237	0.334371	0.115489	0.113248	0.108843	0.384761	0.194073	0.34491	0.121674	0.221096	0.204668
ZNF250	0.0411255	0.160924	0.462866	0.390497	0.248664	0.163403	0.456581	0.344415	0.132326	0.440926	0.134711	0.121641	0.0666587	0.204617
ZNF273	0.0411255	-0.127139	0.486251	0.398853	0.545815	0.190443	0.417439	0.540341	0.485735	0.561894	0.491822	0.580264	0.639287	0.582974
ZNF275	0.0411255	0.158862	0.639799	0.572102	0.548548	0.509144	0.649199	0.386968	0.29208	0.300015	0.322577	0.537584	0.336988	0.563344
ZNF354B	0.0411255	-0.122479	0	0.20521	0.193255	0.274952	0.155938	0.15014	0.308207	0.259342	0.231298	0.381398	0.170626	0.363498
ZNF415	0.0411255	-0.201499	0.461284	0.175207	0.283807	0.3202	0.233204	0.127035	0.431413	0.370006	0.333912	0.568227	0.788674	0.317496
ZNF689	0.0411255	0.176806	0.805345	0.39155	0.642949	0.692339	0.862128	0.766148	0.637309	0.598689	0.58435	0.461397	0.46884	0.349037
AQP1	0.0415959	-0.130671	0.133724	0	0	0	0	0.294698	0.187497	0.120621	0.32273	0.135917	0.138989	0.306692
ZNF699	0.0415959	-0.225653	0.389178	0	0	0.165565	0	0	0.388724	0.155078	0.507423	0.17394	0.400849	0.282649
AR	0.0438264	0.0498905	0.0755025	0.117806	0.047531	0.135009	0.0712515	0.0355197	0	0.0351464	0	0.110677	0	0.0374538
FAM82A1	0.0438264	0.270933	0.680838	0.221263	0.20858	0.535226	0.462507	0.373441	0.400632	0	0.142023	0	0.313599	0
HIST1H3G	0.0438264	0.545506	0.875177	0.979387	1.79048	0	1.12091	0.943608	0	0.764229	0.424336	0.733797	0.514161	0
LGI3	0.0438264	0.169107	0.348781	0.205956	0.458903	0.112546	0.110355	0.262393	0	0.105019	0.16762	0.211653	0	0
LOC401588	0.0438264	0.162893	0.183339	0.376428	0.292213	0.244635	0.0957243	0.382828	0	0.166235	0	0.255976	0	0.175598
NDC80	0.0438264	0.261385	0.375586	0.343038	0.759257	0	0.359963	0.422465	0	0.148235	0	0.166414	0.291937	0.085413
PPFIA4	0.0438264	-0.123264	0	0.144361	0.0947934	0.0763645	0	0.133372	0.278624	0.185632	0	0.326804	0.151947	0.245468
SLC6A15	0.0438264	0.0867531	0.21145	0	0.178807	0.204722	0.143836	0.138419	0.118286	0.0739496	0	0	0.085897	0.0785844
ZC3H12B	0.0438264	-0.0482419	0.0565865	0	0.0680133	0.0544657	0.053336	0	0.118122	0.0959071	0.120285	0	0.0857738	0.101765
CYGB	0.0449512	0.241828	0.552678	0.538323	0.476024	0.278138	0.0861399	0.546154	0.537685	0.0818664	0.234104	0	0.172835	0
GPR135	0.0449512	-0.305605	0.10583	0	0.428263	0	0.249758	0.096112	0.775112	0.392691	0.7513	0.193798	0.110131	0.490558
HIST1H3J	0.0449512	0.650623	1.13687	0.816905	1.79872	0.607405	0.900844	0.82623	0	0.93044	0	0.627045	0.323759	0.301988
LOC286367	0.0449512	-0.183309	0	0.142811	0	0.330195	0.106685	0.102507	0.367756	0.411585	0.329073	0.280274	0.285696	0.107665
PSMB9	0.0449512	0.490423	1.10001	1.20994	1.06405	0.520901	0.982947	1.17235	1.0993	0	0.790115	0.297594	0	0.920642
RAB30	0.0449512	-0.210324	0	0	0.245907	0.342516	0.200579	0.265242	0.286927	0.425726	0.291308	0.464092	0.21852	0.629616
